# Supplementary material
Source: PubMed Central journal article supplement (PMC2901498)

## Supporting Information

### Optimization of an Unnatural Base Pair Towards Natural-Like Replication

Young Jun Seo, Gil Tae Hwang, Phillip Ordoukhanian, and Floyd E. Romesberg\*  
Department of Chemistry, The Scripps Research Institute, 10550 N. Torrey Pines Road, La  
Jolla, California, 92037

|                  | Contents                                                                                                                                   | Page  |
|------------------|--------------------------------------------------------------------------------------------------------------------------------------------|-------|
| <b>Scheme S1</b> | d <b>5FM</b> synthetic scheme                                                                                                              | S4    |
| <b>Scheme S2</b> | d <b>5NaM</b> synthetic scheme                                                                                                             | S4    |
|                  | Synthetic procedures and characterizations                                                                                                 | S5–S7 |
| <b>Table S1</b>  | Kinetic data for insertion of triphosphates opposite d <b>5SICS</b> in sequence context I                                                  | S8    |
| <b>Table S2</b>  | Kinetic data for insertion of triphosphates opposite d <b>MMO2</b> , d <b>5FM</b> , or d <b>NaM</b> in sequence context I                  | S9    |
| <b>Table S3</b>  | Kinetic data for extension of dN:d <b>5SICS</b> in sequence context I                                                                      | S10   |
| <b>Table S4</b>  | Kinetic data for extension of dN:d <b>MMO2</b> , dN:d <b>5FM</b> , and dN:d <b>NaM</b> in sequence context I                               | S11   |
| <b>Table S5</b>  | Kinetic data for insertion of triphosphates opposite d <b>5SICS</b> in sequence context II                                                 | S12   |
| <b>Table S6</b>  | Kinetic data for insertion of triphosphates opposite d <b>MMO2</b> , d <b>5FM</b> , or d <b>NaM</b> in sequence context II                 | S13   |
| <b>Table S7</b>  | Kinetic data for extension of dN:d <b>5SICS</b> in sequence context II                                                                     | S14   |
| <b>Table S8</b>  | Kinetic data for extension of dN:d <b>MMO2</b> , dN:d <b>5FM</b> , and dN:d <b>NaM</b> in sequence context II                              | S15   |
| <b>Table S9</b>  | Kinetic data for insertion of d <b>NaM</b> opposite d <b>5SICS</b> in sequence context III                                                 | S16   |
| <b>Table S10</b> | Kinetic data for insertion of d <b>NaM</b> opposite d <b>5SICS</b> in sequence context IV                                                  | S16   |
| <b>Figure S1</b> | Raw gel data and plots of representative data(d <b>NaMTP</b> insertion opposite d <b>5SICS</b> and extension in sequence context I and II) | S17   |

## NMR and HRMS Spectrum of Novel Compounds

| Compound (see scheme S1 and S2) | Spectrum            | Page |
|---------------------------------|---------------------|------|
| <b>3a</b>                       | $^1\text{H}$ NMR    | S18  |
| <b>3a</b>                       | $\text{C}^{13}$ NMR | S19  |
| <b>3a</b>                       | Homo-Cozy NMR       | S20  |
| <b>3a</b>                       | 1D-NOE NMR          | S21  |
| <b>4a</b>                       | $^1\text{H}$ NMR    | S22  |
| <b>4a</b>                       | $\text{C}^{13}$ NMR | S23  |
| <b>5a</b>                       | $^1\text{H}$ NMR    | S24  |
| <b>5a</b>                       | $\text{P}^{31}$ NMR | S25  |
| <b>6a</b>                       | $\text{P}^{31}$ NMR | S26  |
| <b>dNaM</b> intermediate        | $^1\text{H}$ NMR    | S27  |
| <b>dNaM</b> intermediate        | $\text{C}^{13}$ NMR | S28  |
| <b>dNaM</b> intermediate        | Homo-Cozy NMR       | S29  |
| <b>dNaM</b> intermediate        | 1D-NOE NMR          | S30  |
| <b>2b</b>                       | $^1\text{H}$ NMR    | S31  |
| <b>2b</b>                       | $\text{C}^{13}$ NMR | S32  |
| <b>3b</b>                       | $^1\text{H}$ NMR    | S33  |
| <b>3b</b>                       | $\text{C}^{13}$ NMR | S34  |
| <b>4b</b>                       | $^1\text{H}$ NMR    | S35  |
| <b>4b</b>                       | $\text{P}^{31}$ NMR | S36  |
| <b>5b</b>                       | $\text{P}^{31}$ NMR | S37  |
| <b>3a</b>                       | HRMS                | S38  |
| <b>4a</b>                       | HRMS                | S39  |
| <b>5a</b>                       | HRMS                | S40  |
| <b>2b</b>                       | HRMS                | S41  |
| <b>3b</b>                       | HRMS                | S42  |
| <b>4b</b>                       | HRMS                | S43  |

## MALDI-TOF mass spectral data<sup>a</sup>

| Sequence                                                            | MALDI-TOF signal [M <sup>+</sup> ] |           | Page |
|---------------------------------------------------------------------|------------------------------------|-----------|------|
|                                                                     | Calc. m/z                          | Found m/z |      |
| <b>P1:</b> 5'-d (TAATACGACTCACTATAGGGAGANaM)                        | 7416                               | 7413      | S44  |
| <b>P2:</b> 5'-d (TAATACGACTCACTATAGGGAGAFM)                         | 7398                               | 7394      | S45  |
| <b>P3:</b> 5'-d (TAATACGACTCACTATAGGGAGA5SICS)                      | 7433                               | 7426      | S46  |
| <b>P4:</b> 5'-d (TAATACGACTCACTATAGGGAGAMMO2)                       | 7380                               | 7374      | S47  |
| <b>T1:</b> 3'-d (ATTATGCTGAGTGATATCCCTCTNaMGCTAGGTTCGGCAGGATCGC)    | 13890                              | 13893     | S48  |
| <b>T2:</b> 3'-d (ATTATGCTGAGTGATATCCCTCTFMGCTAGGTTCGGCAGGATCGC)     | 13872                              | 13876     | S49  |
| <b>T3:</b> 3'-d (ATTATGCTGAGTGATATCCCTCT5SICSGCTAGGTTCGGCAGGATCGC)  | 13907                              | 13907     | S50  |
| <b>T4:</b> 3'-d (ATTATGCTGAGTGATATCCCTCTMMO2GCTAGGTTCGGCAGGATCGC)   | 13854                              | 13857     | S51  |
| <b>P5:</b> 5'-d (TAATACGACTCACTATAGGGAGCNaM)                        | 7393                               | 7396      | S52  |
| <b>P6:</b> 5'-d (TAATACGACTCACTATAGGGAGCFM)                         | 7375                               | 7382      | S53  |
| <b>P7:</b> 5'-d (TAATACGACTCACTATAGGGAGC5SICS)                      | 7410                               | 7414      | S54  |
| <b>P8:</b> 5'-d (TAATACGACTCACTATAGGGAGCMMO2)                       | 7357                               | 7361      | S55  |
| <b>T5:</b> 3'-:d (ATTATGCTGAGTGATATCCCTCGNaMTCTAGGTTCGGCAGGATCGC)   | 13890                              | 13891     | S56  |
| <b>T6:</b> 3'-:d (ATTATGCTGAGTGATATCCCTCGFMTCTAGGTTCGGCAGGATCGC)    | 13872                              | 13877     | S57  |
| <b>T7:</b> 3'-:d (ATTATGCTGAGTGATATCCCTCG5SICSTCTAGGTTCGGCAGGATCGC) | 13907                              | 13888     | S58  |
| <b>T8:</b> 3'-:d (ATTATGCTGAGTGATATCCCTCGMMO2TCTAGGTTCGGCAGGATCGC)  | 13854                              | 13852     | S59  |
| <b>T9:</b> 3'-d (ATTATGCTGAGTGATATCCCTCA5SICSTCTAGGTTCGGCAGGATCGC)  | 13916                              | 13915     | S60  |
| <b>T10:</b> 3'-d (ATTATGCTGAGTGATATCCCTCC5SICSTCTAGGTTCGGCAGGATCGC) | 13892                              | 13890     | S61  |

<sup>a</sup> **P1-P4:** primers for context I, **T1-T4:** templates for context I, **P5-P8:** primers for context II, **T5-T8:** templates for context II and **T9-T10:** templates for context III and IV.

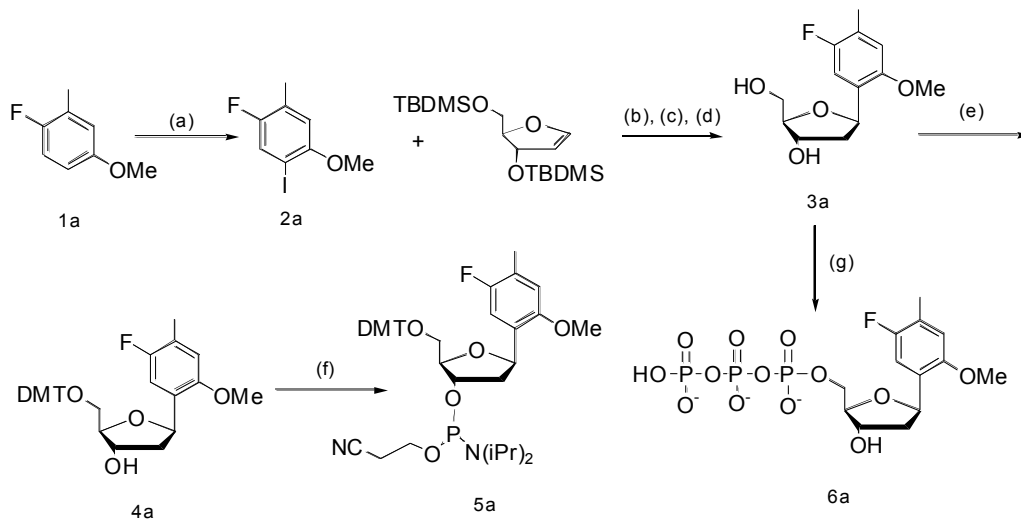

**Scheme S1.** (a)  $I_2$ ,  $AgNO_3$ , MeOH, yield:73%; (b)  $Pd(OAc)_2$ ,  $AsPh_3$ ,  $n-Bu_3N$ , DMF, 70 °C ; (c)  $n$ -TBAF, 0 °C; (d)  $NaBH(OAc)_3$ , AcOH,  $CH_3CN$ , overall yield:52%; (e) DMTrCl, DMAP,  $Et_3N$ , pyridine, yield:78%; (f)  $NC(CH_2)_2OP(iPr_2)N_2$ , DIPEA,  $CH_2Cl_2$ , yield:85%; (g) Proton Sponge,  $POCl_3$ ,  $Bu_3N$ ,  $Bu_3NPPi$ ,  $(MeO)_3P$ , DMF, -20 °C.

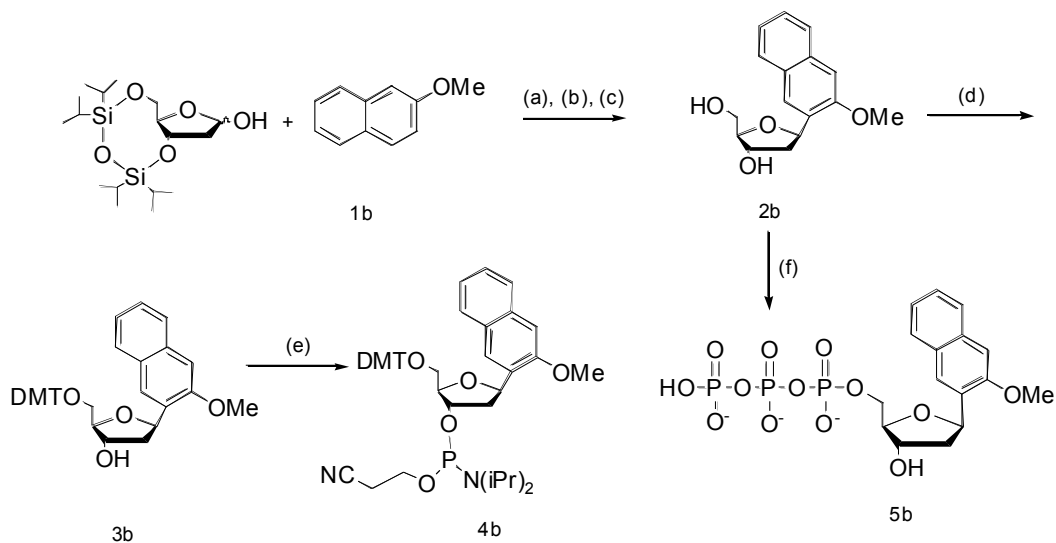

**Scheme S2.** (a) 1.6 M  $n-BuLi$ , THF, -10 °C; (b)  $n-Bu_3P$ , TMAD, THF, rt ; (c) TBAF, THF, rt, overall yield: 22%; (d) DMTrCl, DMAP,  $Et_3N$ , pyridine, yield: 82%; (e)  $NC(CH_2)_2OP(iPr_2)N_2$ , DIPEA,  $CH_2Cl_2$ , yield: 92%; (f) Proton Sponge,  $POCl_3$ ,  $Bu_3N$ ,  $Bu_3NPPi$ ,  $(MeO)_3P$ , DMF, -20 °C.

## Synthetic procedures and characterizations

**Compound 2b.** A mixture of 2-methoxy naphthalene (700mg, 4.4 mmol) in THF (10 mL) was stirred under nitrogen atmosphere at room temperature for 30 minutes, after which 1.6 M *n*-BuLi (2.7ml, 28.5mmol) was added dropwise and the mixture was stirred for 2 h at room temperature. After cooling to -10 °C, 3,5-O-[1,1,3,3-tetrakis(1-methylethyl)-1,3-disiloxanediy] 2-deoxy-D-erythro-pent-1-enitol (537 mg, 1.43 mmol) was added and the temperature was increased slowly to room temperature and the mixture stirred for 30 min. The reaction mixture was extracted with EtOAc (50 mL × 3) and saturated NH<sub>4</sub>Cl aq. (50 mL) and the combined organic layers were dried over anhydrous Na<sub>2</sub>SO<sub>4</sub>. After filtration and evaporation, the residue was purified by silica gel column chromatography (EtOAc/hexane (1:2), R<sub>f</sub> = 0.38). The eluted product, without further purification, was dissolved in THF (3 mL) and tri-*n*-butyl phosphin (87 µl, 0.35 mmol) was added. The resulting solution was cooled to 0 °C, *N,N,N',N'*-tetramethylazodicarboxamide (60 mg, 0.35 mmol) was added, and the solution was stirred overnight at room temperature. Tetrabutylammoniumfluoride (0.45 mL, 0.45 mmol) was added to this mixture at room temperature and stirred for 3 h. The reaction mixture extracted with EtOAc (30 mL × 3) and saturated NaHCO<sub>3</sub> aq. (30 mL) and the combined organic layers were dried over anhydrous Na<sub>2</sub>SO<sub>4</sub>. After filtration and evaporation, the residue was purified by silica gel column chromatography (EtOAc R<sub>f</sub> = 0.42) to afford **2b** (86 mg, 0.31 mmol, 22% from 3 steps) as a white solid. <sup>1</sup>H NMR (300 MHz, MeOH-*d*4) δ 7.28-8.07 (m, 6 H, ArH), 5.57 (dd, *J*=9.9 Hz, 5.7 Hz, 1 H, H-1'), 4.37-4.41 (m, 1 H, H-3'), 4.05-4.10 (m, 1 H, H-4'), 4.01 (s, 3H, OCH<sub>3</sub>), 4.82 (dd, *J*=5.4 Hz, *J*=2.7 Hz, 2H, H-5'), 2.49-2.56 (m, 1 H, H-2'), 1.86-1.96 (m, 1 H, H-2'). <sup>13</sup>C NMR (300 MHz, MeOH-*d*4) δ 155.1, 134.1, 129.0, 127.4, 126.2, 125.7, 124.5, 123.4, 104.7, 87.4, 75.7, 73.1, 62.9, 54.5, 48.6, 42.2. HRMS calcd for C<sub>16</sub>H<sub>18</sub>O<sub>4</sub> (MNa<sup>+</sup>) 297.1097, found 297.1104.

**Compound 3a.** A mixture of palladium acetate (16 mg, 0.071 mmol) and triphenylarsine (43.6 mg, 0.14 mmol) in DMF (3 mL) was stirred under argon atmosphere at room temperature for 20 min. Then **2a** (190 mg, 0.71 mmol), 1,4-anhydro-3,5-bis-O-(tert-butyl)dimethylsilyl)-2-deoxy-D-erythro-pent-1-enitol (205 mg, 0.594 mmol), and tri-*n*-butylamine (170mg, 0.92 mmol) in DMF (5 mL) were added, and the resulting reaction mixture was stirred under nitrogen at 70 °C for 18 h. The mixture was cooled to 0 °C, and 1 M tetra-*n*-butylammonium fluoride (3.16mL, 3.16 mmol) in THF was added and the mixture stirred for 1 h. The reaction mixture was filtered through Celite and extracted with EtOAc (50 mL × 3) and saturated NaHCO<sub>3</sub> aq. (50 mL). The combined organic layers were dried over anhydrous Na<sub>2</sub>SO<sub>4</sub>. After filtration and evaporation, the residue was purified by silica gel column chromatography (5% MeOH/CH<sub>2</sub>Cl<sub>2</sub>, R<sub>f</sub> = 0.42). The eluted product was dissolved in acetic acid (2.5 mL) and acetonitril (2.5 mL). The solution was cooled to 0 °C, and sodium triacetoxyhydride (240 mg, 1.13 mmol) was added followed by stirring for 1 h. The reaction mixture was extracted with EtOAc (50 mL × 3) and saturated NaHCO<sub>3</sub> aq. (50 mL) and the combined organic layers were dried over

anhydrous Na<sub>2</sub>SO<sub>4</sub>. After filtration and evaporation, the residue was purified by silica gel column chromatography (EtOAc, R<sub>f</sub> = 0.53) to afford **3a** (79 mg, 0.3 mmol, 52 % over 3 steps) as a white solid. <sup>1</sup>H NMR (300 MHz, MeOH-*d*<sub>4</sub>) δ 7.26 (d, *J*=10.5 Hz, 1 H, ArH), 6.83 (d, *J*=6 Hz, 1 H ArH), 5.41 (dd, *J*=10.2 Hz, 5.7 Hz, 1 H, H-1'), 4.34 (dt, *J*=6 Hz, *J*=2.7 Hz 1 H, H-3'), 3.98(td, 1 H, *J*=5.4 Hz, *J*=2.7 Hz 1 H, H-4'), 3.86(s, 3H, OCH<sub>3</sub>), 3.74 (dd, *J*=5.4 Hz, *J*=1.2 Hz, 2H, H-5'), 2.34-2.41 (m, 1H, H-2'), 2.30 (d, *J*=2.1 Hz, CH<sub>3</sub>), 1.75-1.85(m, 1H, H-2'). <sup>13</sup>C NMR (300 MHz, MeOH-*d*<sub>4</sub>) δ 157.3, 130.1, 123.5, 112.9, 112.4, 87.4, 74.8, 73.2, 62.8, 55.2, 47.3, 42.2, 13.4. HRMS calcd for C<sub>13</sub>H<sub>17</sub>FO<sub>4</sub> (MNa<sup>+</sup>) 279.1002, found 279.1003.

**General DMTr-protection Procedure.** To a solution of free nucleoside (~100 mg, 1 eq.) and *N,N*-dimethylaminopyridine (0.2 eq.) in pyridine (1 mL), 4,4'- dimethoxytrityl chloride (1.3 eq.) and triethylamine (1.3 eq.) were added. The solution was stirred for 18 h at ambient temperature. After quenching the reaction by adding MeOH, the mixture was evaporated to dryness *in vacuo*. The residue was extracted with EtOAc (50 mL x 3) and water (50 mL), and the organic layer was collected, dried over anhydrous Na<sub>2</sub>SO<sub>4</sub>, filtered, and evaporated to dryness under reduced pressure. The crude product was purified by silica gel column chromatography (hexane:EtOAc = 3:1 to 2:1) to afford the DMTr-protected nucleoside as a white foam.

**Compound 4a.** <sup>1</sup>H NMR (300 MHz, CDCl<sub>3</sub>) δ 7.12-7.41 (m, 11H, Ar-H), 6.81-6.89 (m, 4 H, Ar-H), 6.61(bs, 1 H, OH), 5.32 (dd, *J*=9.9 Hz, 5.7 Hz, 1 H, H-1'), 4.29-4.33 (m, 1 H, H-3'), 4.10-4.18(m, 1 H, H-4'), 3.83(bs, 6H, Ar-OCH<sub>3</sub>), 3.71 (bs, 3H, Ar-OCH<sub>3</sub>), 3.35(dd, 1H, *J*=9.6 Hz, *J*=4.8 Hz, H-5'), 3.20(dd, 1H, *J*=9.6 Hz, *J*=5.4 Hz, H-5'), 2.28-2.35 (m, 1H, H-2'), 2.21(s, 3H, CH<sub>3</sub>) 1.79-1.88(m, 1H, H-2'). <sup>13</sup>C NMR (300 MHz, CDCl<sub>3</sub>) δ 158.6, 155.1, 151.1, 145.2, 135.4, 130.2, 129.5, 128.2, 127.5, 125.3, 112.3, 111.2, 87.4, 78.7, 76.9, 76.3, 73.1, 62.8, 55.8, 42.1, 14.5. HRMS calcd for C<sub>34</sub>H<sub>35</sub>FO<sub>6</sub> (MNa<sup>+</sup>) 581.2310, found 581.2312.

**Compound 3b.** <sup>1</sup>H NMR (300 MHz, CDCl<sub>3</sub>) δ 7.09-7.64 (m, 11 H, Ar-H), 6.72-6.75 (m, 4 H, Ar-H), 5.44 (dd, *J*=9.0 Hz, 6.3 Hz, 1 H, H-1'), 4.30-4.34 (m, 1 H, H-3'), 3.97-4.07(m, 1 H, H-4'), 3.83(s, 6H, Ar-OCH<sub>3</sub>), 3.68 (s, 3H, Ar-OCH<sub>3</sub>), 3.36(dd, 1H, *J*=9.9 Hz, *J*=4.5 Hz, H-5'), 3.26(dd, 1H, *J*=9.6 Hz, *J*=5.4 Hz, H-5'), 2.36-2.43 (m, 1H, H-2'), 1.83-1.96(m, 1H, H-2'). <sup>13</sup>C NMR (300 MHz, CDCl<sub>3</sub>) δ 158.7, 155.0, 145.0, 136.2, 133.7, 132.7, 130.7, 128.3, 127.9, 126.9, 124.8, 123.7, 113.2, 104.9, 86.3, 85.6, 77.5, 75.5, 74.7, 64.5, 55.4, 42.4. HRMS calcd for C<sub>37</sub>H<sub>36</sub>O<sub>6</sub> (MNa<sup>+</sup>) 599.2404, found 599.2402.

**General Phosphoramidite Synthesis Procedure.** To a solution of DMTr-protected nucleoside (100 mg, 1 eq.) and diisopropylethylamine (4 eq.) in dichloromethane (1 mL) was added 2-cyanoethyl *N,N*-diisopropylchlorophosphoramidite (1.5 eq.) at 0 °C. After stirring for 30 min at ambient temperature, the reaction mixture was extracted with EtOAc (30 mL x 3) and saturated NaHCO<sub>3</sub> aq. (20 mL). The organic layers were collected, dried over anhydrous Na<sub>2</sub>SO<sub>4</sub>, filtered, and evaporated to dryness under reduced pressure. The

crude product was purified by silica gel column chromatography (hexane:EtOAc = 3:1 to 2:1) to afford compound as a pale yellow foam.

**Compound 5a.**  $^1\text{H}$  NMR (400 MHz,  $\text{CDCl}_3$ )  $\delta$  7.18-7.47 (m, 11 H, Ar-H), 6.80-6.84 (m, 4 H, Ar-H), 6.5-6.6 (m, 1 H, Ar-H), 5.32(ddd,  $J=7.8$  Hz, 5.7 Hz, 3.6Hz, 1 H, H-1'), 4.36-4.49 (m, 1 H, H-3'), 4.17-4.20(m, 1 H, H-4'), 3.76(t, 6H, Ar-OCH<sub>3</sub>), 3.74 (bs, 3H, Ar-OCH<sub>3</sub>), 3.64-3.83(m, 2H, CH<sub>2</sub>), 3.50-3.62(m, 2H, CH<sub>2</sub>), 3.22-3.27 (m, 2H, H-5'), 2.58-2.78 (m, 2H, CH), 2.41-2.52 (m, 1H, H-2'), 2.23(s, 3H, CH<sub>3</sub>), 1.73-1.82(m, 1H, H-2'), 1.04-1.27 (m, 12 H, N-CH<sub>3</sub>).  $^{31}\text{P}$  NMR (400 MHz,  $\text{CDCl}_3$ ):  $\delta$  148.5, 148.1. HRMS calcd for  $\text{C}_{43}\text{H}_{52}\text{FN}_2\text{O}_7\text{P}(\text{MH}^+)$  759.3569, found 759.3559.

**Compound 4b.**  $^1\text{H}$  NMR (400 MHz,  $\text{CDCl}_3$ )  $\delta$  7.10-8.08 (m, 11 H, Ar-H), 6.80-6.83 (m, 4 H, Ar-H), 5.51-5.56 (m, 1 H, H-1'), 4.40-4.57 (m, 1 H, H-3'), 4.20-4.28(m, 1 H, H-4'), 3.93(d, 3H, Ar-OCH<sub>3</sub>), 3.77 (bs, 6H, Ar-OCH<sub>3</sub>), 3.65-3.73(m, 2H, CH<sub>2</sub>), 3.54-3.66(m, 2H, CH<sub>2</sub>), 3.30-3.43 (m, 2H, H-5'), 2.61-2.67(m, 2H, CH), 2.47-2.51(m, 1H, H-2'), 1.99(s, 3H, CH<sub>3</sub>), 1.91-1.98(m, 1H, H-2'), 1.06-1.31 (m, 12 H, N-CH<sub>3</sub>).  $^{31}\text{P}$  NMR (400MHz,  $\text{CDCl}_3$ ):  $\delta$  148.7, 148.1. HRMS calcd for  $\text{C}_{46}\text{H}_{53}\text{N}_2\text{O}_7\text{P}(\text{MH}^+)$  777.3663, found 777.3659.

**General Procedure for Triphosphate Synthesis.** Proton sponge (1.5 equiv) and the free nucleoside (1 equiv) were dissolved in trimethyl phosphate (0.3 M) and cooled to  $-20$  °C.  $\text{POCl}_3$  (1.5 equiv) was added dropwise, and the purple slurry was stirred at  $-20$  °C for 2 h. Tributylamine (6.2 equiv) was added, followed by a solution of tributylammonium pyrophosphate (5.0 equiv) in DMF (0.5 M). After 5 min, the reaction was quenched by addition of 0.5 M aqueous  $\text{Et}_3\text{NH}_2\text{CO}_3$  (20 vol-equiv) and the resulting solution was lyophilized. Purification by reverse-phase (C18) HPLC (4-35%  $\text{CH}_3\text{CN}$  in 0.1 M  $\text{Et}_3\text{NH}_2\text{CO}_3$ , pH 7.5) followed by lyophilization afforded the triphosphate as a white solid.

**Compound 6a.**  $^{31}\text{P}$  NMR (400 MHz,  $\text{D}_2\text{O}$ ):  $\delta$  -9.00 – -9.11(m;  $\gamma$ -P), -10.64 (d,  $J = 37.2$  Hz;  $\alpha$ -P), -22.5 (t,  $J = 37.5$  Hz;  $\beta$ -P).

**Compound 5b.**  $^{31}\text{P}$  NMR (400 MHz,  $\text{D}_2\text{O}$ ):  $\delta$  -10.02 – -10.83 (m;  $\gamma$ -P,  $\alpha$ -P), -22.65 - -22.98 (m;  $\beta$ -P).

**Table S1.** Kinetic data for insertion of dYTP d**5SICS** in sequence context I<sup>a</sup>

5' -d (TAATACGACTCACTATAGGGAGA)

3' -d (ATTATGCTGAGTGATATCCCTCT**X**GCTAGGTTACGGCAGGATCGC)

| X(Template)  | dYTP          | $k_{\text{cat}}$ (min <sup>-1</sup> ) | $K_M$ ( $\mu\text{M}$ )      | $k_{\text{cat}}/K_M$ (M <sup>-1</sup> min <sup>-1</sup> ) |
|--------------|---------------|---------------------------------------|------------------------------|-----------------------------------------------------------|
| <b>5SICS</b> | <b>MMO2</b>   | 12 $\pm$ 1                            | 33 $\pm$ 6                   | 3.6 $\times$ 10 <sup>5</sup>                              |
|              | <b>5FM</b>    | 8.2 $\pm$ 1.8                         | 2.3 $\pm$ 0.3                | 3.6 $\times$ 10 <sup>6</sup>                              |
|              | <b>NaM</b>    | 25 $\pm$ 5                            | 4.9 $\pm$ 1.2                | 5.0 $\times$ 10 <sup>6</sup>                              |
|              | <b>5SICS</b>  | 1.7 $\pm$ 0.5                         | 63 $\pm$ 4                   | 2.7 $\times$ 10 <sup>4</sup>                              |
|              | A             | 1.2 $\pm$ 0.3                         | 54 $\pm$ 6                   | 2.2 $\times$ 10 <sup>4</sup>                              |
|              | C             | nd <sup>b</sup>                       | nd <sup>b</sup>              | <1.0 $\times$ 10 <sup>3</sup>                             |
|              | G             | 4.6 $\pm$ 0.6                         | 36 $\pm$ 4                   | 1.3 $\times$ 10 <sup>5</sup>                              |
| T            | 1.7 $\pm$ 0.2 | 130 $\pm$ 19                          | 1.3 $\times$ 10 <sup>4</sup> |                                                           |

<sup>a</sup> See Experimental Section for experimental details. <sup>b</sup> Rates too slow to independently determine  $k_{\text{cat}}$  and  $K_M$ .



**Table S2.** Kinetic data for insertion of dYTP opposite dMMO2, d5FM, or dNaM in sequence context I<sup>a</sup>

5'-d (TAATACGACTCACTATAGGGAGA)

3'-d (ATTATGCTGAGTGATATCCCTCT**X**GCTAGGTTACGGCAGGATCGC)

| X(Template) | dYTP         | $k_{\text{cat}}$ (min <sup>-1</sup> ) | $K_M$ ( $\mu\text{M}$ ) | $k_{\text{cat}}/K_M$ (M <sup>-1</sup> min <sup>-1</sup> ) |
|-------------|--------------|---------------------------------------|-------------------------|-----------------------------------------------------------|
| <b>MMO2</b> | <b>5SICS</b> | 8.5 ± 0.1                             | 0.18 ± 0.01             | 4.7 × 10 <sup>7</sup>                                     |
|             | <b>MMO2</b>  | 5.1 ± 0.7                             | 44 ± 4                  | 1.2 × 10 <sup>5</sup>                                     |
|             | A            | 3.3 ± 0.3                             | 32 ± 4                  | 1.0 × 10 <sup>5</sup>                                     |
|             | G            | nd <sup>b</sup>                       | nd <sup>b</sup>         | <1.0 × 10 <sup>3</sup>                                    |
|             | C            | nd <sup>b</sup>                       | nd <sup>b</sup>         | <1.0 × 10 <sup>3</sup>                                    |
|             | T            | nd <sup>b</sup>                       | nd <sup>b</sup>         | <1.0 × 10 <sup>3</sup>                                    |
| <b>5FM</b>  | <b>5SICS</b> | 3.3 ± 1.0                             | 0.23 ± 0.03             | 1.4 × 10 <sup>7</sup>                                     |
|             | <b>FM</b>    | 10.8 ± 2.4                            | 12.2 ± 3.9              | 8.9 × 10 <sup>5</sup>                                     |
|             | A            | 6.1 ± 1.0                             | 20 ± 2                  | 3.0 × 10 <sup>5</sup>                                     |
|             | G            | nd <sup>b</sup>                       | nd <sup>b</sup>         | <1.0 × 10 <sup>3</sup>                                    |
|             | C            | nd <sup>b</sup>                       | nd <sup>b</sup>         | <1.0 × 10 <sup>3</sup>                                    |
|             | T            | 0.31 ± 0.1                            | 131 ± 15                | 2.4 × 10 <sup>3</sup>                                     |
| <b>NaM</b>  | <b>5SICS</b> | 3.7 ± 0.8                             | 0.10 ± 0.03             | 3.7 × 10 <sup>7</sup>                                     |
|             | <b>NaM</b>   | 6.9 ± 1.6                             | 2.0 ± 0.4               | 3.4 × 10 <sup>6</sup>                                     |
|             | A            | 8.1 ± 1.7                             | 11.4 ± 4.3              | 7.1 × 10 <sup>5</sup>                                     |
|             | G            | nd <sup>b</sup>                       | nd <sup>b</sup>         | <1.0 × 10 <sup>3</sup>                                    |
|             | C            | nd <sup>b</sup>                       | nd <sup>b</sup>         | <1.0 × 10 <sup>3</sup>                                    |
|             | T            | 0.77 ± 0.12                           | 136 ± 4.3               | 5.6 × 10 <sup>3</sup>                                     |

<sup>a</sup> See Experimental Section for experimental details. <sup>b</sup> Rates too slow to independently determine  $k_{\text{cat}}$  and  $K_M$ .

**Table S3.** Kinetic data for extension of dN:d**5SICS** by dCTP insertion in sequence context I<sup>a</sup>

5' -d (TAATACGACTCACTATAGGGAGAY)

3' -d (ATTATGCTGAGTGATATCCCTCT**X**GCTAGGTTACGGCAGGATCGC)

| <b>X(Template)</b> | <b>Y</b>     | $k_{\text{cat}}$ (min <sup>-1</sup> ) | $K_M$ (μM)      | $k_{\text{cat}}/K_M$ (M <sup>-1</sup> min <sup>-1</sup> ) |
|--------------------|--------------|---------------------------------------|-----------------|-----------------------------------------------------------|
| <b>5SICS</b>       | <b>MMO2</b>  | 6.4 ± 1.1                             | 3.4 ± 0.3       | 1.9 × 10 <sup>6</sup>                                     |
|                    | <b>5FM</b>   | 3.49 ± 0.11                           | 0.63 ± 0.10     | 5.5 × 10 <sup>6</sup>                                     |
|                    | <b>NaM</b>   | 3.1 ± 0.9                             | 2.47 ± 0.40     | 1.2 × 10 <sup>6</sup>                                     |
|                    | <b>5SICS</b> | nd <sup>b</sup>                       | nd <sup>b</sup> | <1.0 × 10 <sup>3</sup>                                    |
|                    | A            | 0.79 ± 0.01                           | 76 ± 11         | 1.0 × 10 <sup>4</sup>                                     |
|                    | G            | 0.62 ± 0.02                           | 127 ± 8         | 4.9 × 10 <sup>3</sup>                                     |
|                    | C            | 0.18 ± 0.01                           | 44 ± 9          | 4.2 ± 10 <sup>3</sup>                                     |
|                    | T            | 2.0 ± 0.1                             | 4.9 ± 0.3       | 4.0 ± 10 <sup>5</sup>                                     |

<sup>a</sup> See Experimental Section for experimental details. <sup>b</sup> Rates too slow to independently determine  $k_{\text{cat}}$  and  $K_M$ .

**Table S4.** Kinetic data for extension of dN:d**MMO2**, dN:d**5FM**, and dN:d**NaM** by dCTP insertion in sequence context I<sup>a</sup>

5' -d (TAATACGACTCACTATAGGGAGAY)

3' -d (ATTATGCTGAGTGATATCCCTCT**X**GCTAGGTTACGGCAGGATCGC)

| X(Template) | Y            | $k_{\text{cat}}$ (min <sup>-1</sup> ) | $K_M$ (μM)      | $k_{\text{cat}}/K_M$ (M <sup>-1</sup> min <sup>-1</sup> ) |
|-------------|--------------|---------------------------------------|-----------------|-----------------------------------------------------------|
| <b>MMO2</b> | <b>5SICS</b> | 3.8 ± 0.3                             | 5.7 ± 1.2       | 6.7 × 10 <sup>5</sup>                                     |
|             | <b>MMO2</b>  | 0.87 ± 0.28                           | 165 ± 47        | 5.3 × 10 <sup>3</sup>                                     |
|             | A            | 8.7 ± 0.9                             | 187 ± 17        | 4.6 × 10 <sup>4</sup>                                     |
|             | G            | nd <sup>b</sup>                       | nd <sup>b</sup> | <1.0 × 10 <sup>3</sup>                                    |
|             | C            | 3.90 ± 1.32                           | 3.17 ± 0.23     | 1.2 × 10 <sup>6</sup>                                     |
|             | T            | 6.23 ± 1.01                           | 9.45 ± 1.23     | 6.6 × 10 <sup>5</sup>                                     |
| <b>FM</b>   | <b>5SICS</b> | 3.2 ± 0.7                             | 1.4 ± 0.3       | 2.3 × 10 <sup>6</sup>                                     |
|             | <b>5FM</b>   | 2.57 ± 0.39                           | 99.5 ± 17.9     | 2.6 × 10 <sup>4</sup>                                     |
|             | A            | 5.49 ± 0.08                           | 17.3 ± 1.6      | 3.2 × 10 <sup>5</sup>                                     |
|             | G            | nd <sup>b</sup>                       | nd <sup>b</sup> | <1.0 × 10 <sup>3</sup>                                    |
|             | C            | 2.4 ± 0.23                            | 1.19 ± 0.10     | 2.0 × 10 <sup>6</sup>                                     |
|             | T            | 4.14 ± 0.19                           | 2.06 ± 0.17     | 2.0 × 10 <sup>6</sup>                                     |
| <b>NaM</b>  | <b>5SICS</b> | 5.73 ± 0.51                           | 2.15 ± 0.50     | 2.7 × 10 <sup>6</sup>                                     |
|             | <b>NaM</b>   | 0.78 ± 0.21                           | 69 ± 25         | 1.1 × 10 <sup>4</sup>                                     |
|             | A            | 3.99 ± 1.46                           | 102 ± 35        | 3.9 × 10 <sup>4</sup>                                     |
|             | G            | nd <sup>b</sup>                       | nd <sup>b</sup> | <1.0 × 10 <sup>3</sup>                                    |
|             | C            | 7.29 ± 0.69                           | 4.78 ± 0.24     | 1.5 × 10 <sup>6</sup>                                     |
|             | T            | 4.73 ± 0.42                           | 8.33 ± 0.27     | 5.7 × 10 <sup>5</sup>                                     |

<sup>a</sup> See Experimental Section for experimental details. <sup>b</sup> Rates too slow to independently determine  $k_{\text{cat}}$  and  $K_M$ .

**Table S5.** Kinetic data for insertion of dYTP opposite d**5SICS** in sequence context II<sup>a</sup>

5' -d (TAATACGACTCACTATAGGGAGC)

3' -d (ATTATGCTGAGTGATATCCCTCG**X**TCTAGGTTACGGCAGGATCGC)

| <b>X</b> (Template) | dYTP            | $k_{\text{cat}}$ (min <sup>-1</sup> ) | $K_M$ ( $\mu\text{M}$ )      | $k_{\text{cat}}/K_M$ (M <sup>-1</sup> min <sup>-1</sup> ) |
|---------------------|-----------------|---------------------------------------|------------------------------|-----------------------------------------------------------|
| <b>5SICS</b>        | <b>MMO2</b>     | 2.91 $\pm$ 0.76                       | 6.04 $\pm$ 1.9               | 4.8 $\times$ 10 <sup>5</sup>                              |
|                     | <b>5FM</b>      | 9.52 $\pm$ 1.14                       | 2.29 $\pm$ 0.21              | 4.2 $\times$ 10 <sup>6</sup>                              |
|                     | <b>NaM</b>      | 15.0 $\pm$ 1.10                       | 0.37 $\pm$ 0.07              | 4.1 $\times$ 10 <sup>7</sup>                              |
|                     | <b>5SICS</b>    | 1.41 $\pm$ 0.04                       | 5.84 $\pm$ 0.20              | 2.4 $\times$ 10 <sup>5</sup>                              |
|                     | A               | 1.23 $\pm$ 0.24                       | 20.8 $\pm$ 2.86              | 5.9 $\times$ 10 <sup>4</sup>                              |
|                     | C               | nd <sup>b</sup>                       | nd <sup>b</sup>              | <1.0 $\times$ 10 <sup>3</sup>                             |
|                     | G               | 3.11 $\pm$ 0.53                       | 15.9 $\pm$ 2.34              | 1.9 $\times$ 10 <sup>5</sup>                              |
| T                   | 0.62 $\pm$ 0.20 | 74.3 $\pm$ 42.4                       | 8.5 $\times$ 10 <sup>3</sup> |                                                           |

<sup>a</sup> See Experimental Section for experimental details. <sup>b</sup> Rates too slow to independently determine  $k_{\text{cat}}$  and  $K_M$ .

**Table S6.** Kinetic data for insertion of dYTP opposite dMMO2, d5FM, or dNaM in sequence context II<sup>a</sup>

5' -d (TAATACGACTCACTATAGGGAGC)

3' -d (ATTATGCTGAGTGATATCCCTCG**X**TCTAGGTTACGGCAGGATCGC)

| X(Template) | dYTP         | $k_{cat}$ (min <sup>-1</sup> ) | $K_M$ ( $\mu$ M) | $k_{cat}/K_M$ (M <sup>-1</sup> min <sup>-1</sup> ) |
|-------------|--------------|--------------------------------|------------------|----------------------------------------------------|
| <b>MMO2</b> | <b>5SICS</b> | 10.7 $\pm$ 2.4                 | 0.16 $\pm$ 0.04  | 6.6 $\times$ 10 <sup>7</sup>                       |
|             | <b>MMO2</b>  | 15.2 $\pm$ 3.4                 | 8.34 $\pm$ 3.8   | 1.8 $\times$ 10 <sup>6</sup>                       |
|             | A            | 17.4 $\pm$ 4.1                 | 10.2 $\pm$ 3.3   | 1.7 $\times$ 10 <sup>6</sup>                       |
|             | G            | 0.16 $\pm$ 0.001               | 20.3 $\pm$ 5.0   | 7.9 $\times$ 10 <sup>3</sup>                       |
|             | C            | 0.65 $\pm$ 0.04                | 219 $\pm$ 46     | 3.0 $\times$ 10 <sup>3</sup>                       |
|             | T            | 1.21 $\pm$ 0.06                | 235 $\pm$ 123    | 5.2 $\times$ 10 <sup>3</sup>                       |
| <b>5FM</b>  | <b>5SICS</b> | 12.3 $\pm$ 2.6                 | 0.15 $\pm$ 0.04  | 8.0 $\times$ 10 <sup>7</sup>                       |
|             | <b>5FM</b>   | 5.37 $\pm$ 0.33                | 1.98 $\pm$ 0.39  | 2.7 $\times$ 10 <sup>6</sup>                       |
|             | A            | 22.6 $\pm$ 4.1                 | 7.4 $\pm$ 1.5    | 3.1 $\times$ 10 <sup>6</sup>                       |
|             | G            | 0.16 $\pm$ 0.02                | 135 $\pm$ 52     | 1.2 $\times$ 10 <sup>3</sup>                       |
|             | C            | 1.15 $\pm$ 0.01                | 152 $\pm$ 88     | 7.5 $\times$ 10 <sup>3</sup>                       |
|             | T            | 2.95 $\pm$ 0.64                | 253 $\pm$ 158    | 1.2 $\times$ 10 <sup>4</sup>                       |
| <b>NaM</b>  | <b>5SICS</b> | 12.4 $\pm$ 3.6                 | 0.22 $\pm$ 0.04  | 5.5 $\times$ 10 <sup>7</sup>                       |
|             | <b>NaM</b>   | 5.36 $\pm$ 0.99                | 1.11 $\pm$ 0.08  | 4.8 $\times$ 10 <sup>6</sup>                       |
|             | A            | 21.9 $\pm$ 4.2                 | 15.3 $\pm$ 1.2   | 1.4 $\times$ 10 <sup>6</sup>                       |
|             | G            | 0.1 $\pm$ 0.003                | 26.68 $\pm$ 3.2  | 3.7 $\times$ 10 <sup>3</sup>                       |
|             | C            | 0.63 $\pm$ 0.19                | 98.3 $\pm$ 10.4  | 6.4 $\times$ 10 <sup>3</sup>                       |
|             | T            | 1.18 $\pm$ 0.35                | 141 $\pm$ 17.9   | 8.3 $\times$ 10 <sup>3</sup>                       |

<sup>a</sup> See Experimental Section for experimental details. <sup>b</sup> Rates too slow to independently determine  $k_{cat}$  and  $K_M$ .

**Table S7.** Kinetic data for extension of dN:d**5SICS** by dATP insertion in sequence context II<sup>a</sup>

5'-d (TAATACGACTCACTATAGGGAGC**Y**)

3'-d (ATTATGCTGAGTGATATCCCTCG**X**TCTAGGTTACGGCAGGATCGC)

| X(Template)  | Y            | $k_{\text{cat}}$ ( $\text{min}^{-1}$ ) | $K_M$ ( $\mu\text{M}$ ) | $k_{\text{cat}}/K_M$ ( $\text{M}^{-1} \text{min}^{-1}$ ) |
|--------------|--------------|----------------------------------------|-------------------------|----------------------------------------------------------|
| <b>5SICS</b> | <b>MMO2</b>  | $4.33 \pm 1.17$                        | $13.5 \pm 3.79$         | $3.2 \times 10^5$                                        |
|              | <b>5FM</b>   | $7.28 \pm 1.41$                        | $5.82 \pm 1.70$         | $1.3 \times 10^6$                                        |
|              | <b>NaM</b>   | $2.15 \pm 0.18$                        | $3.15 \pm 1.29$         | $6.8 \times 10^5$                                        |
|              | <b>5SICS</b> | nd <sup>b</sup>                        | nd <sup>b</sup>         | $<1.0 \times 10^3$                                       |
|              | A            | $0.10 \pm 0.03$                        | $29.4 \pm 15.9$         | $3.6 \times 10^3$                                        |
|              | G            | $0.212 \pm 0.04$                       | $324 \pm 35$            | $6.5 \times 10^2$                                        |
|              | C            | nd <sup>b</sup>                        | nd <sup>b</sup>         | $<1.0 \times 10^3$                                       |
|              | T            | $4.99 \pm 0.32$                        | $12.0 \pm 0.3$          | $3.3 \times 10^5$                                        |

<sup>a</sup> See Experimental Section for experimental details. <sup>b</sup> Rates too slow to independently determine  $k_{\text{cat}}$  and  $K_M$ .

**Table S8.** Kinetic data for extension of dN:d**MMO2**, dN:d**5FM**, and dN:d**NaM** by dATP insertion in sequence context II<sup>a</sup>

5' -d (TAATACGACTCACTATAGGGAGC**Y**)

3' -d (ATTATGCTGAGTGATATCCCTCG**X**TCTAGGTTACGGCAGGATCGC)

| X(Template) | Y            | $k_{cat}$ (min <sup>-1</sup> ) | $K_M$ (μM)      | $k_{cat}/K_M$ (M <sup>-1</sup> min <sup>-1</sup> ) |
|-------------|--------------|--------------------------------|-----------------|----------------------------------------------------|
| <b>MMO2</b> | <b>5SICS</b> | 12.4 ± 1.44                    | 7.30 ± 2.39     | 1.7 × 10 <sup>6</sup>                              |
|             | <b>MMO2</b>  | nd <sup>b</sup>                | nd <sup>b</sup> | <1.0 × 10 <sup>3</sup>                             |
|             | A            | 0.42 ± 0.12                    | 38.4 ± 12.5     | 1.1 × 10 <sup>4</sup>                              |
|             | G            | nd <sup>b</sup>                | nd <sup>b</sup> | <1.0 × 10 <sup>3</sup>                             |
|             | C            | 4.91 ± 0.56                    | 11.2 ± 2.41     | 4.4 × 10 <sup>5</sup>                              |
|             | T            | 6.67 ± 0.99                    | 3.37 ± 0.51     | 2.0 × 10 <sup>6</sup>                              |
| <b>5FM</b>  | <b>5SICS</b> | 13.2 ± 0.31                    | 1.63 ± 0.02     | 8.2 × 10 <sup>6</sup>                              |
|             | <b>5FM</b>   | nd <sup>b</sup>                | nd <sup>b</sup> | <1.0 × 10 <sup>3</sup>                             |
|             | A            | 0.59 ± 0.06                    | 13.4 ± 4.0      | 4.4 × 10 <sup>4</sup>                              |
|             | G            | nd <sup>b</sup>                | nd <sup>b</sup> | <1.0 × 10 <sup>3</sup>                             |
|             | C            | 7.17 ± 0.60                    | 4.76 ± 0.77     | 1.5 × 10 <sup>6</sup>                              |
|             | T            | 6.97 ± 1.46                    | 1.72 ± 0.23     | 4.1 × 10 <sup>6</sup>                              |
| <b>NaM</b>  | <b>5SICS</b> | 17.3 ± 5.9                     | 4.16 ± 1.40     | 4.1 × 10 <sup>6</sup>                              |
|             | <b>NaM</b>   | nd <sup>b</sup>                | nd <sup>b</sup> | <1.0 × 10 <sup>3</sup>                             |
|             | A            | 0.34 ± 0.17                    | 23.8 ± 12.7     | 1.4 × 10 <sup>4</sup>                              |
|             | G            | nd <sup>b</sup>                | nd <sup>b</sup> | <1.0 × 10 <sup>3</sup>                             |
|             | C            | 6.29 ± 0.83                    | 21.0 ± 6.1      | 3.0 × 10 <sup>5</sup>                              |
|             | T            | 5.66 ± 0.28                    | 6.85 ± 0.80     | 8.3 × 10 <sup>5</sup>                              |

<sup>a</sup> See Experimental Section for experimental details. <sup>b</sup> Rates too slow to independently determine  $k_{cat}$  and  $K_M$ .

**Table S9.** Kinetic data for insertion of **dNaM** opposite **d5SICS** in sequence context III<sup>a</sup>

5'-d (TAATACGACTCACTATAGGGAGT)  
3'-d (ATTATGCTGAGTGATATCCCTCAXTCTAGGTTACGGCAGGATCGC)

| X(Template)  | dYTP       | $k_{\text{cat}}$ (min <sup>-1</sup> ) | $K_M$ (μM)  | $k_{\text{cat}}/K_M$ (M <sup>-1</sup> min <sup>-1</sup> ) |
|--------------|------------|---------------------------------------|-------------|-----------------------------------------------------------|
| <b>5SICS</b> | <b>NaM</b> | 20.4 ± 4.41                           | 3.44 ± 1.37 | 5.9 × 10 <sup>6</sup>                                     |

<sup>a</sup> See Experimental Section for experimental details.

**Table S10** Kinetic data for insertion of **dNaM** opposite **d5SICS** in sequence context IV<sup>a</sup>

5'-d (TAATACGACTCACTATAGGGAGG)  
3'-d (ATTATGCTGAGTGATATCCCTCCXTCTAGGTTACGGCAGGATCGC)

| X(Template)  | dYTP       | $k_{\text{cat}}$ (min <sup>-1</sup> ) | $K_M$ (μM)  | $k_{\text{cat}}/K_M$ (M <sup>-1</sup> min <sup>-1</sup> ) |
|--------------|------------|---------------------------------------|-------------|-----------------------------------------------------------|
| <b>5SICS</b> | <b>NaM</b> | 29.0 ± 7.7                            | 0.45 ± 0.06 | 6.4 × 10 <sup>7</sup>                                     |

<sup>a</sup> See Experimental Section for experimental details.



1) 5'-d(TAATACGACTCACTATAGGGAG $\Delta$ ) ← dNaMTP  
 3'-d(ATTATGCTGAGTGATATCCCTC $\underline{\text{I}}$ (d5SICS) $\underline{\text{G}}$ CTAGGTTACGGCAGGATCGC)

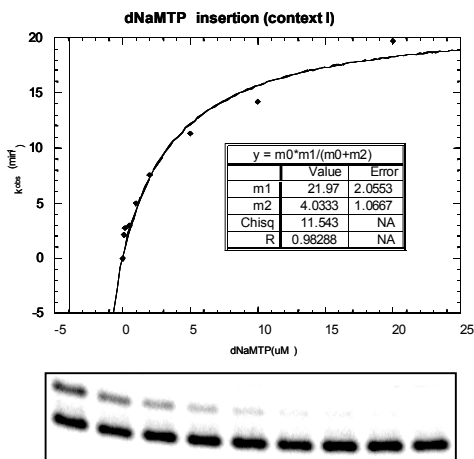

dNaMTP [ $\mu\text{M}$ ] 20 10 5 2 1 0.5 0.2 0.1 0.05

2) 5'-d(TAATACGACTCACTATAGGGAGdNaM) ← dCTP  
 3'-d(ATTATGCTGAGTGATATCCCTC $\underline{\text{I}}$ (d5SICS) $\underline{\text{G}}$ CTAGGTTACGGCAGGATCGC)

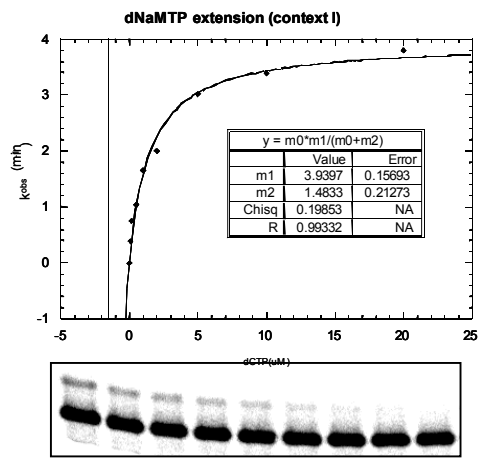

dCTP [ $\mu\text{M}$ ] 20 10 5 2 1 0.5 0.2 0.1 0.05

3) 5'-d(TAATACGACTCACTATAGGGAG $\underline{\text{C}}$ ) ← dNaMTP  
 3'-d(ATTATGCTGAGTGATATCCCTC $\underline{\text{G}}$ (d5SICS) $\underline{\text{I}}$ CTAGGTTACGGCAGGATCGC)

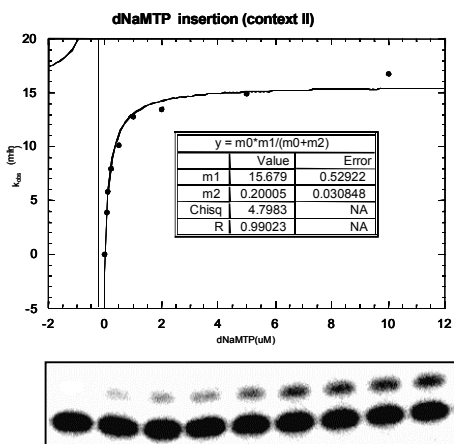

dNaMTP [ $\mu\text{M}$ ] 0.02 0.05 0.1 0.2 0.5 1 2 5 10

4) 5'-d(TAATACGACTCACTATAGGGAGdNaM) ← dATP  
 3'-d(ATTATGCTGAGTGATATCCCTC $\underline{\text{G}}$ (d5SICS) $\underline{\text{I}}$ CTAGGTTACGGCAGGATCGC)

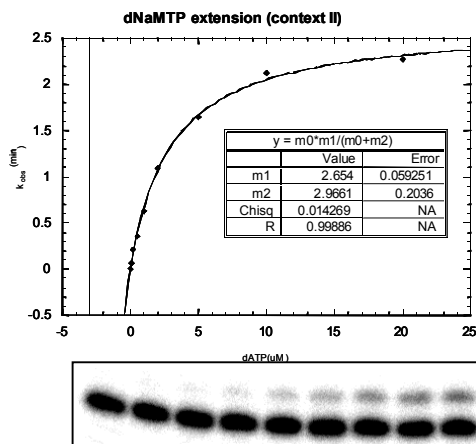

dATP [ $\mu\text{M}$ ] 0.05 0.1 0.2 0.5 1 2 5 10 20

**Figure S1.** Raw gel data and plots of representative data (dNaMTP insertion opposite d5SICS and extension in sequence context I and II)

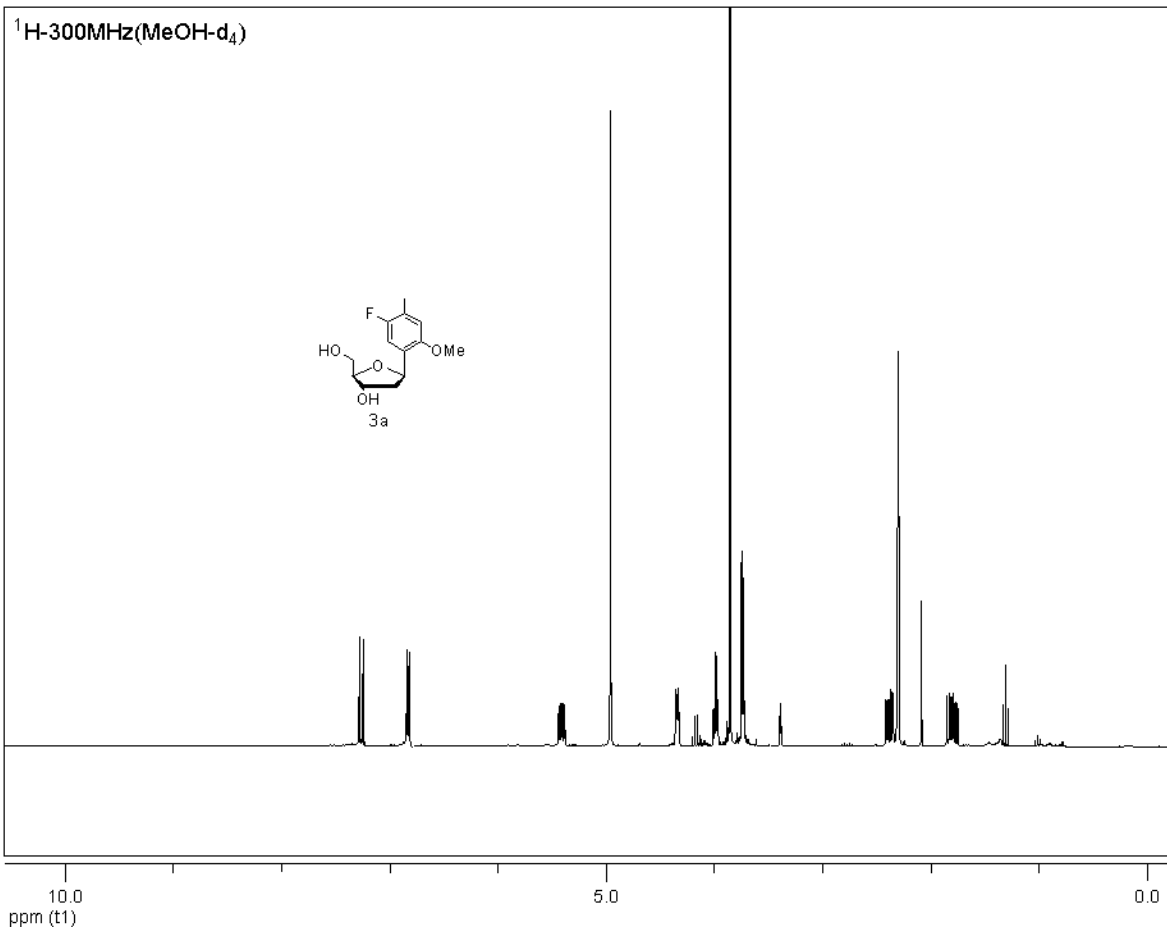

C<sup>13</sup>-300MHz(MeOH-d<sub>4</sub>)

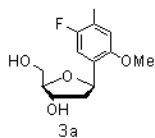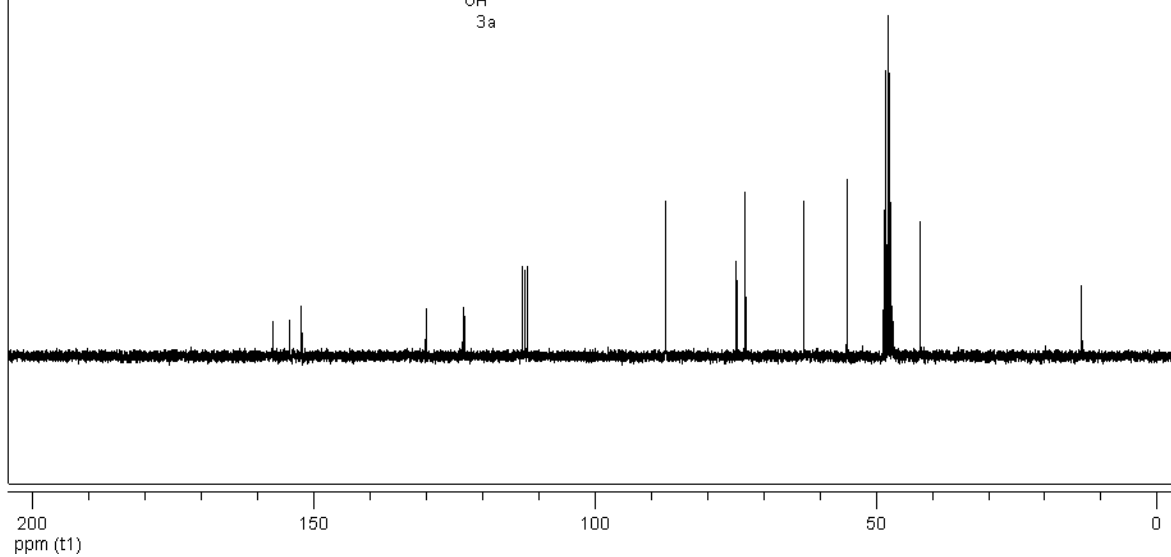

HOMO-COZY-300MHz(MeOH-d<sub>4</sub>)

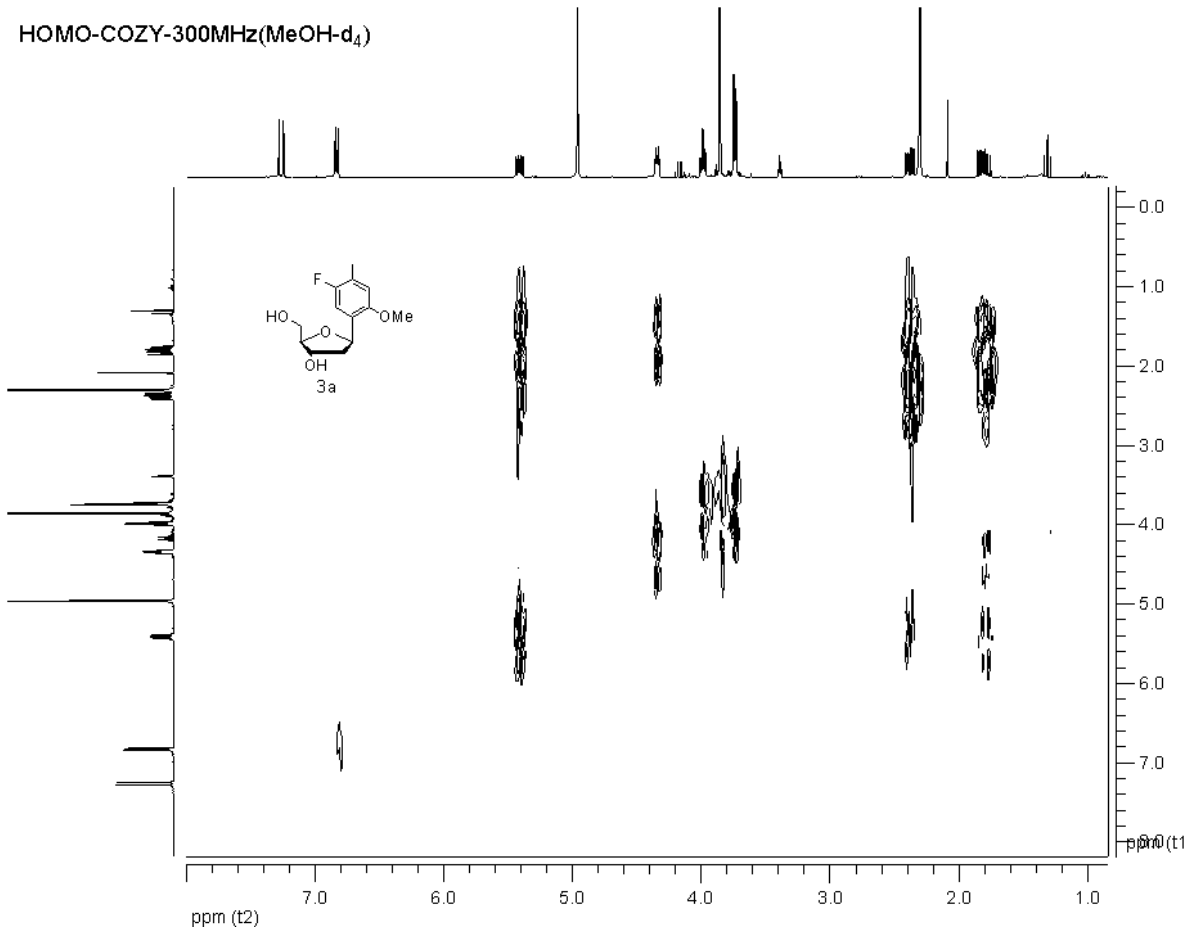

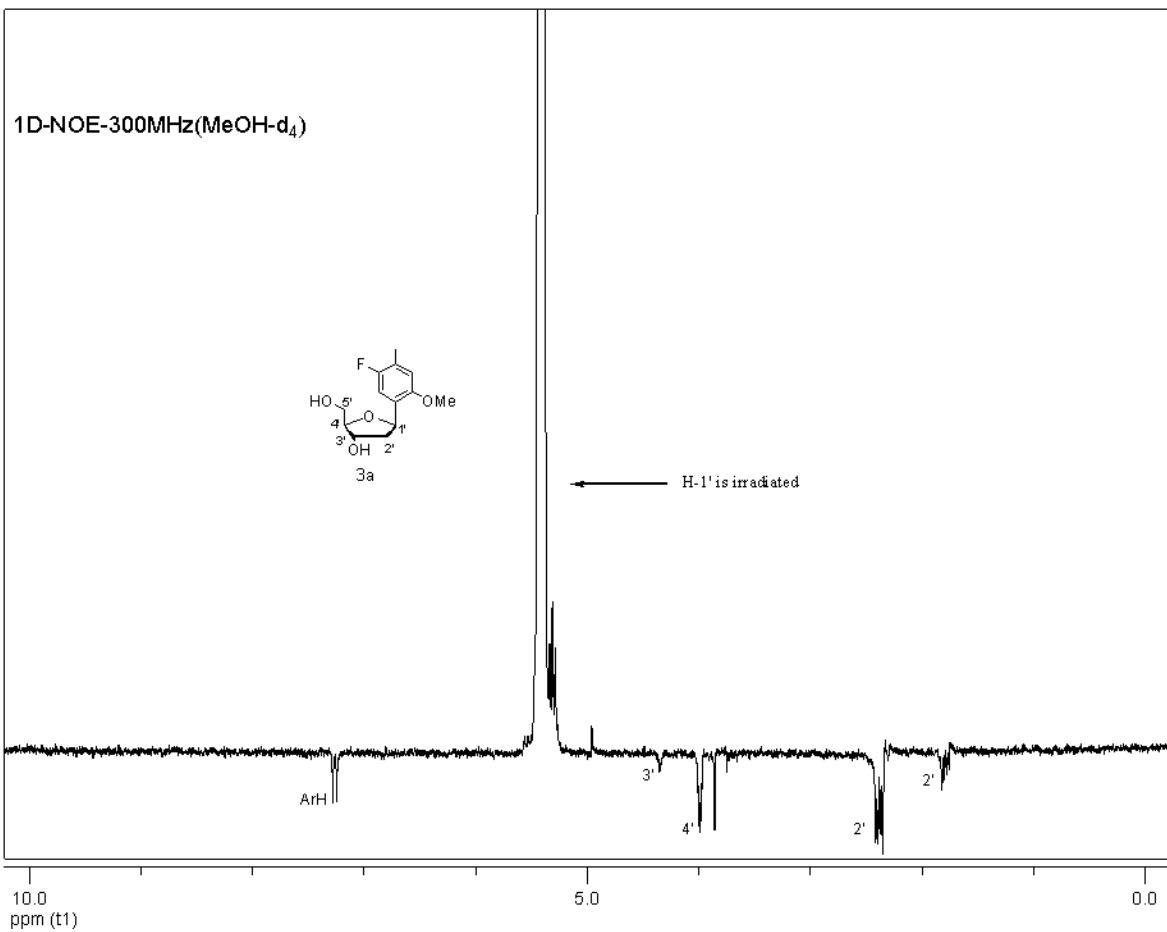

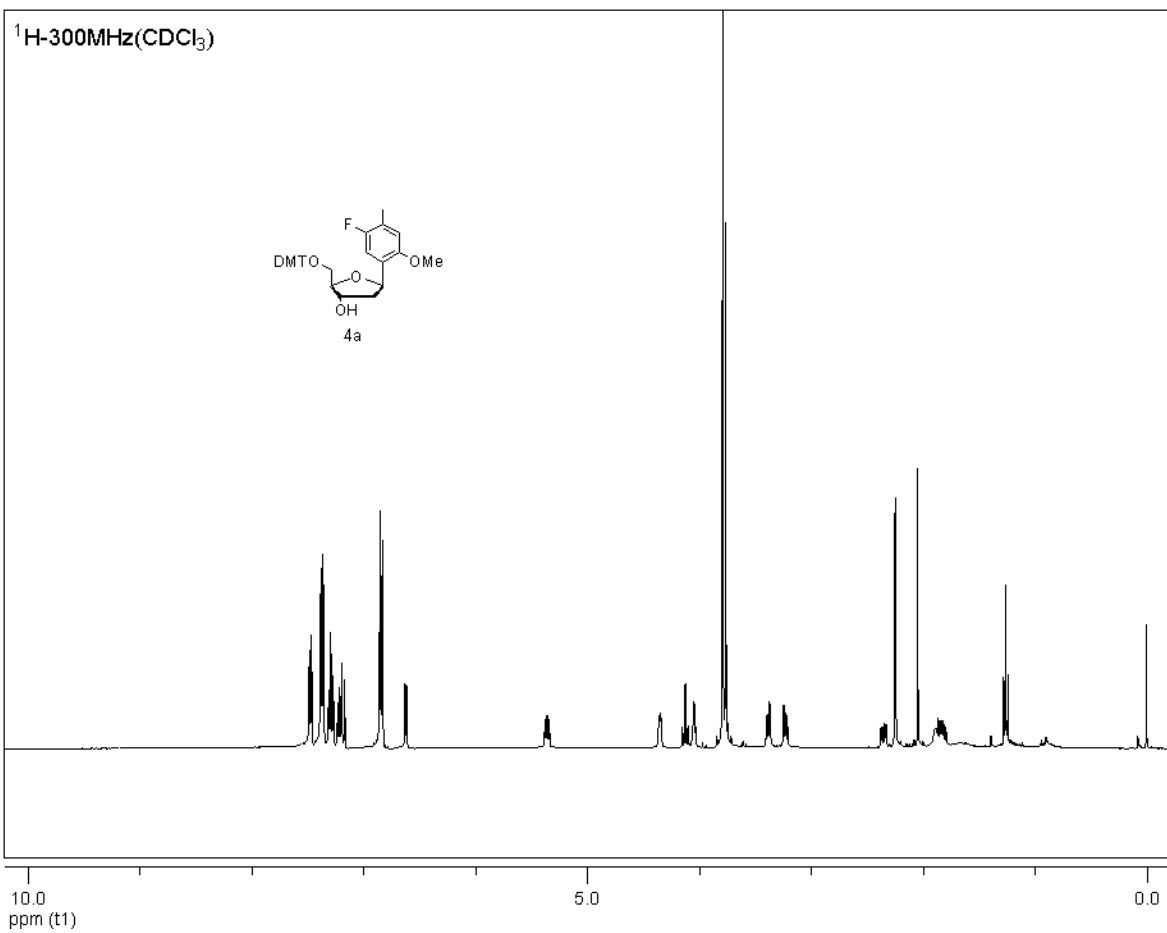

C<sup>13</sup>-300MHz(CDCl<sub>3</sub>)

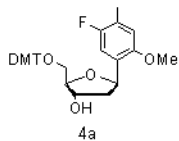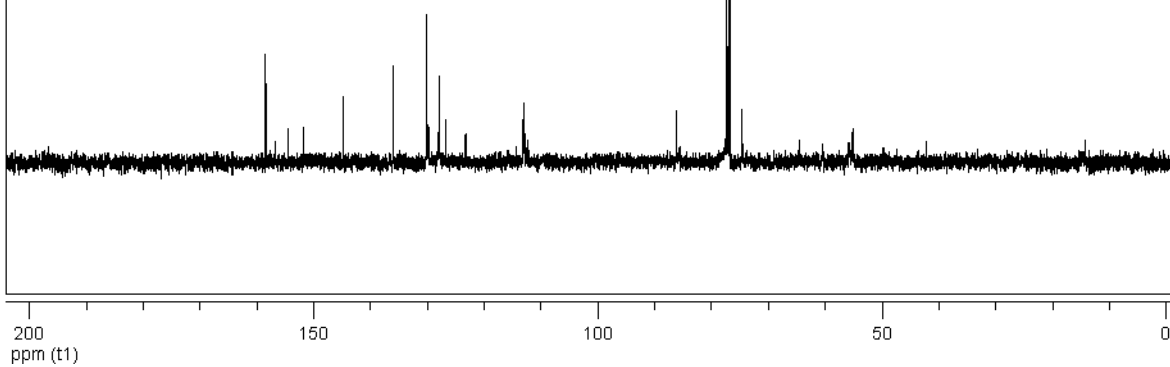

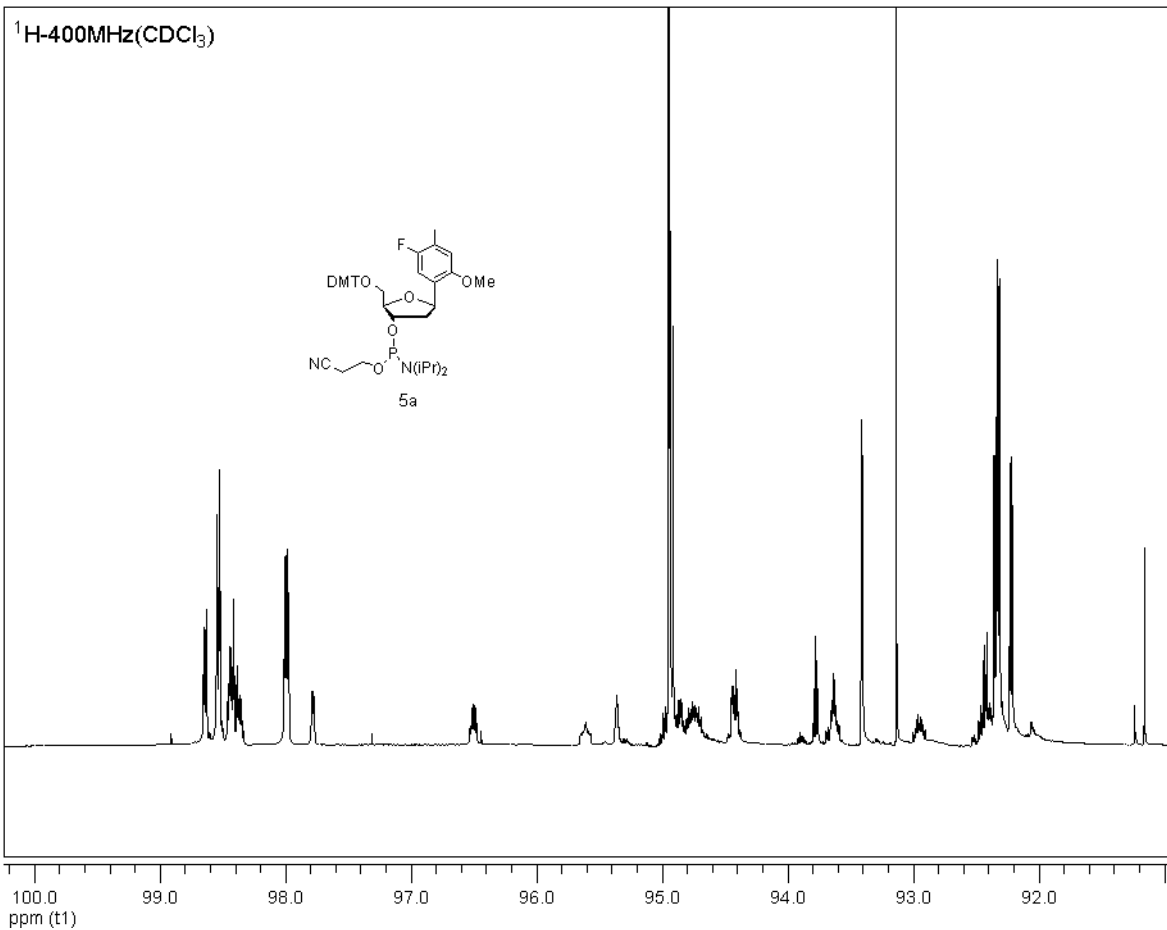



P<sup>31</sup>-400MHz(CDCl<sub>3</sub>)

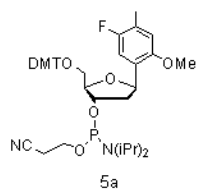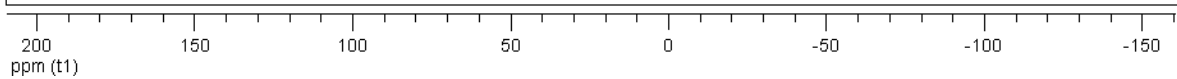

P<sup>31</sup>-400MHz(D<sub>2</sub>O)

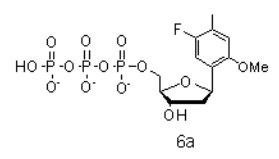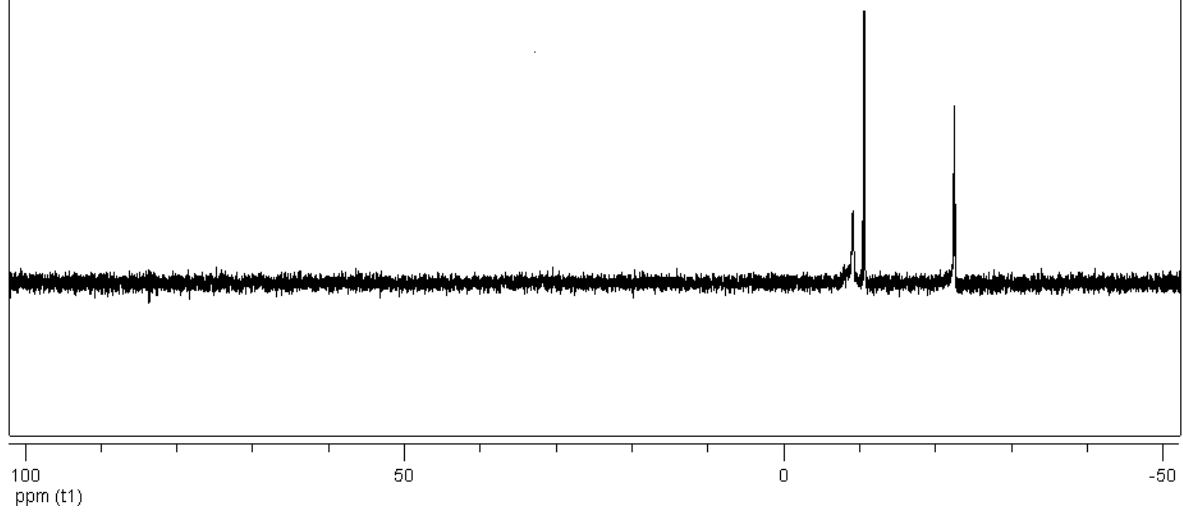

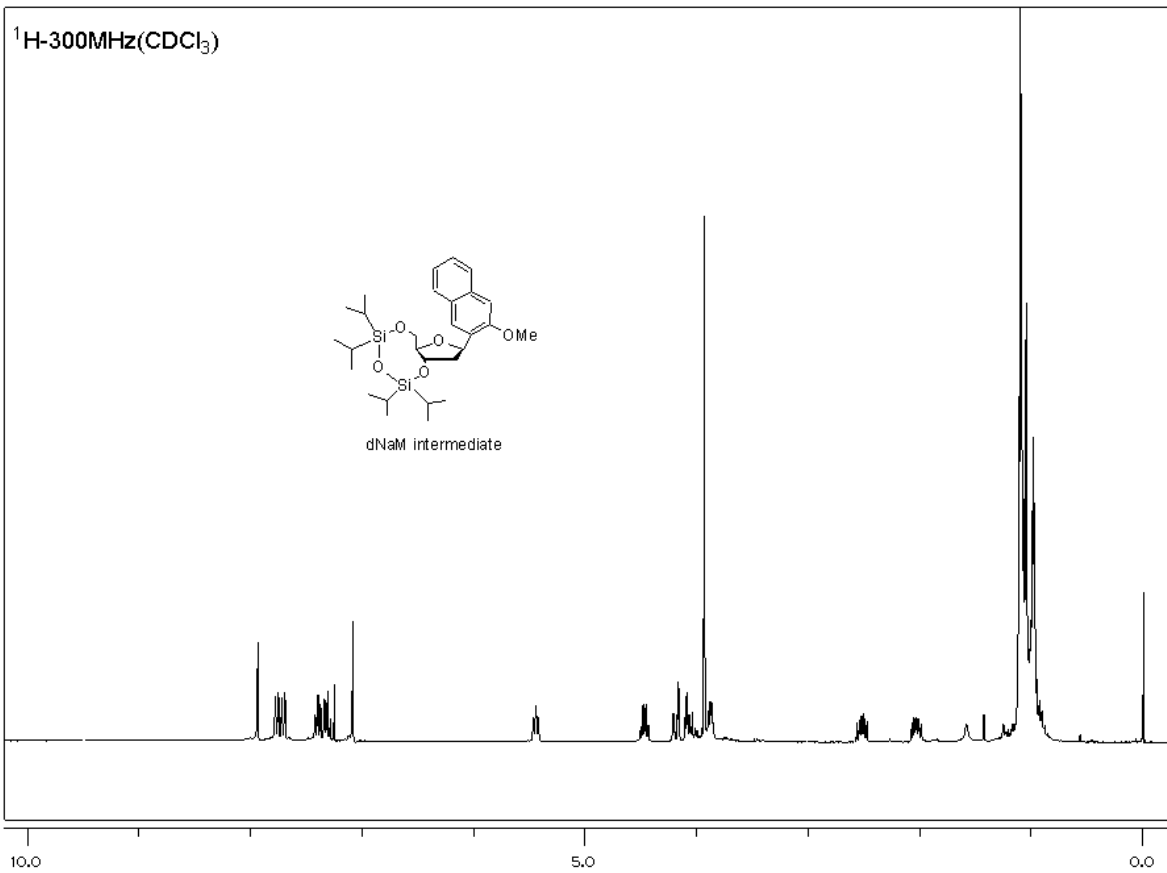

C<sup>13</sup>-300MHz(CDCl<sub>3</sub>)

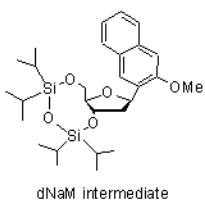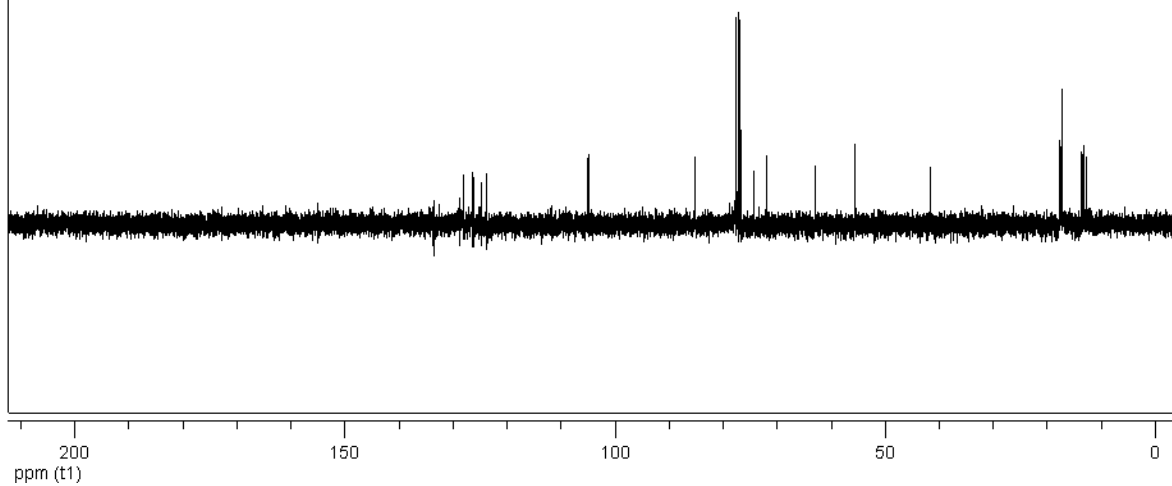

HOMO-COZY-300MHz(CDC<sub>3</sub>)

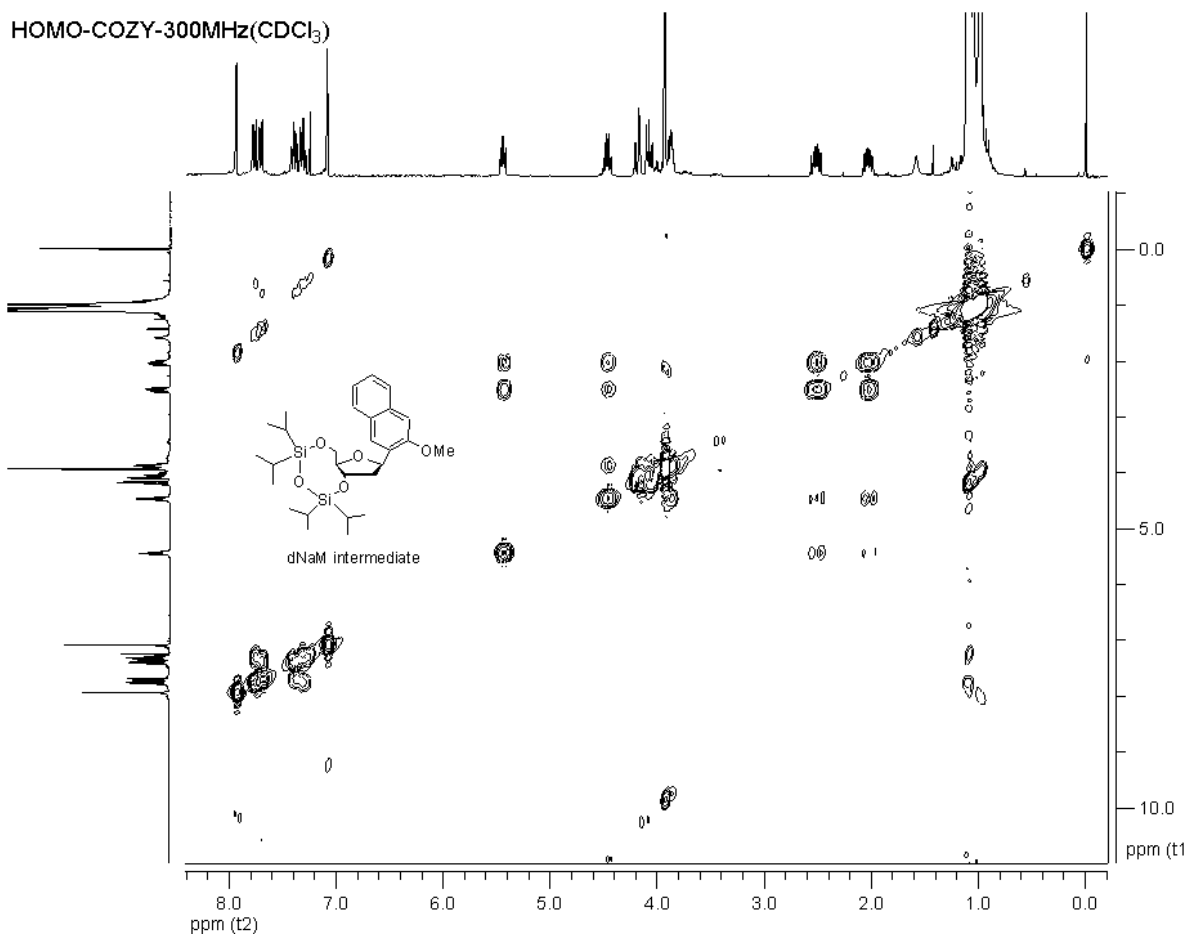

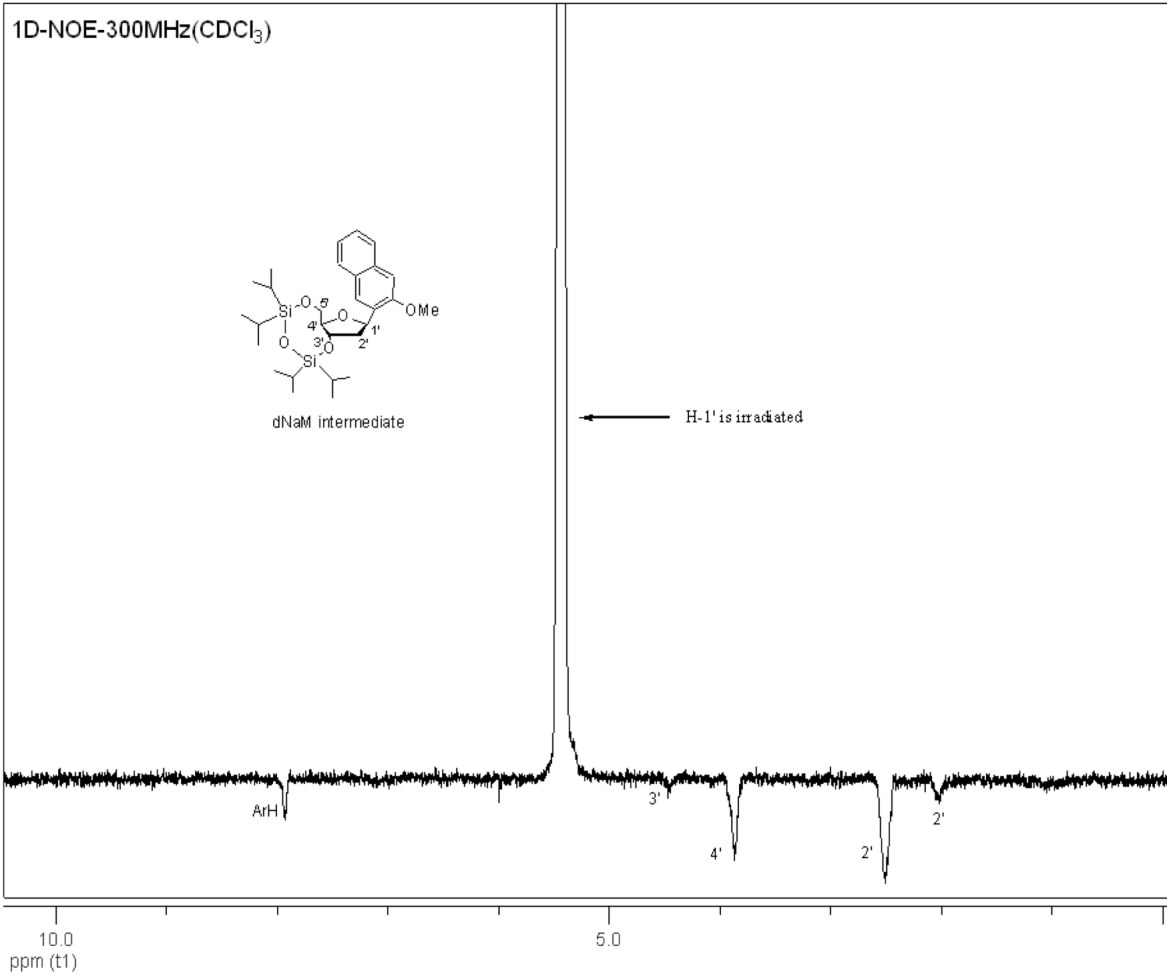

<sup>1</sup>H-300MHz(MeOH-d<sub>4</sub>)

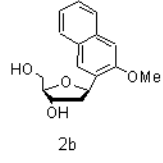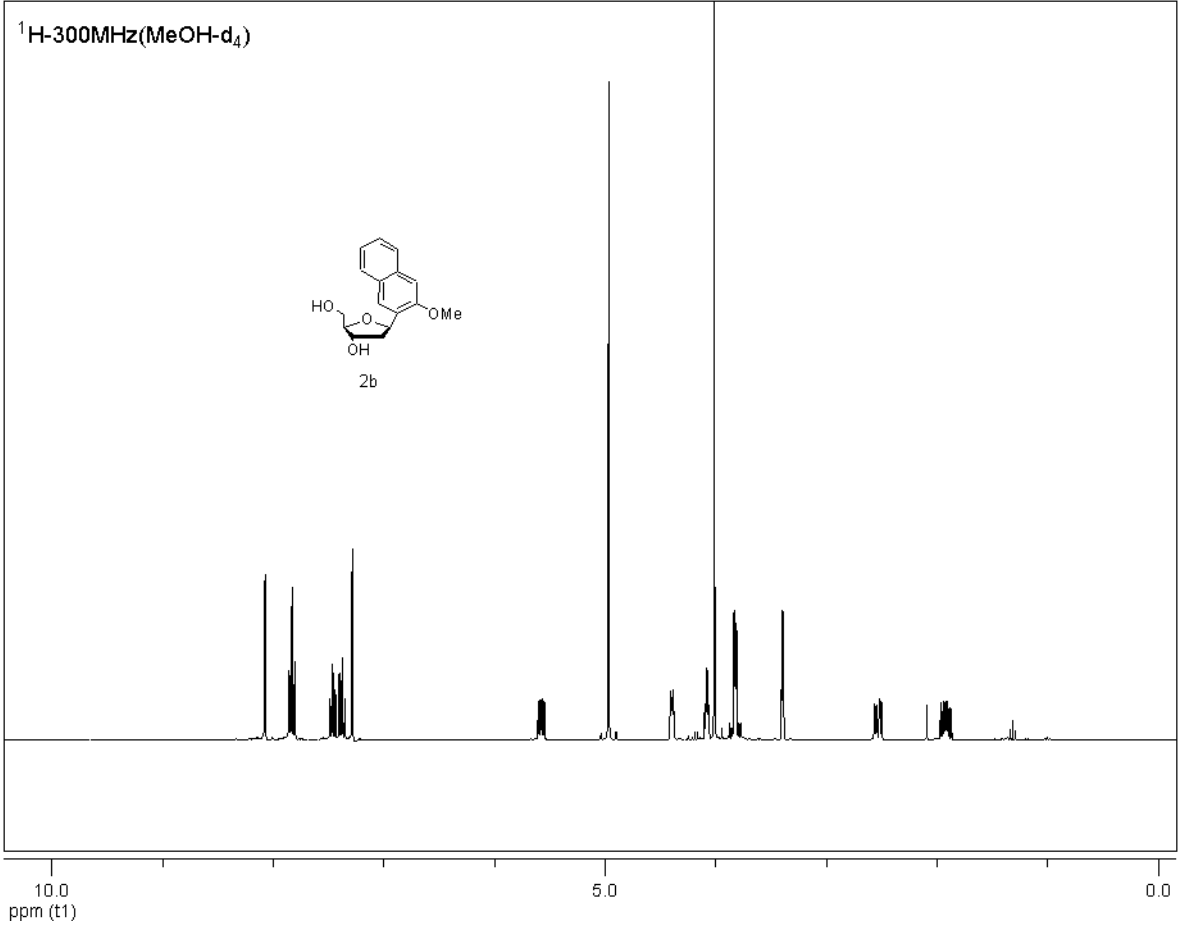

C<sup>13</sup>-300MHz(MeOH-d<sub>4</sub>)

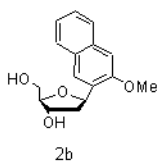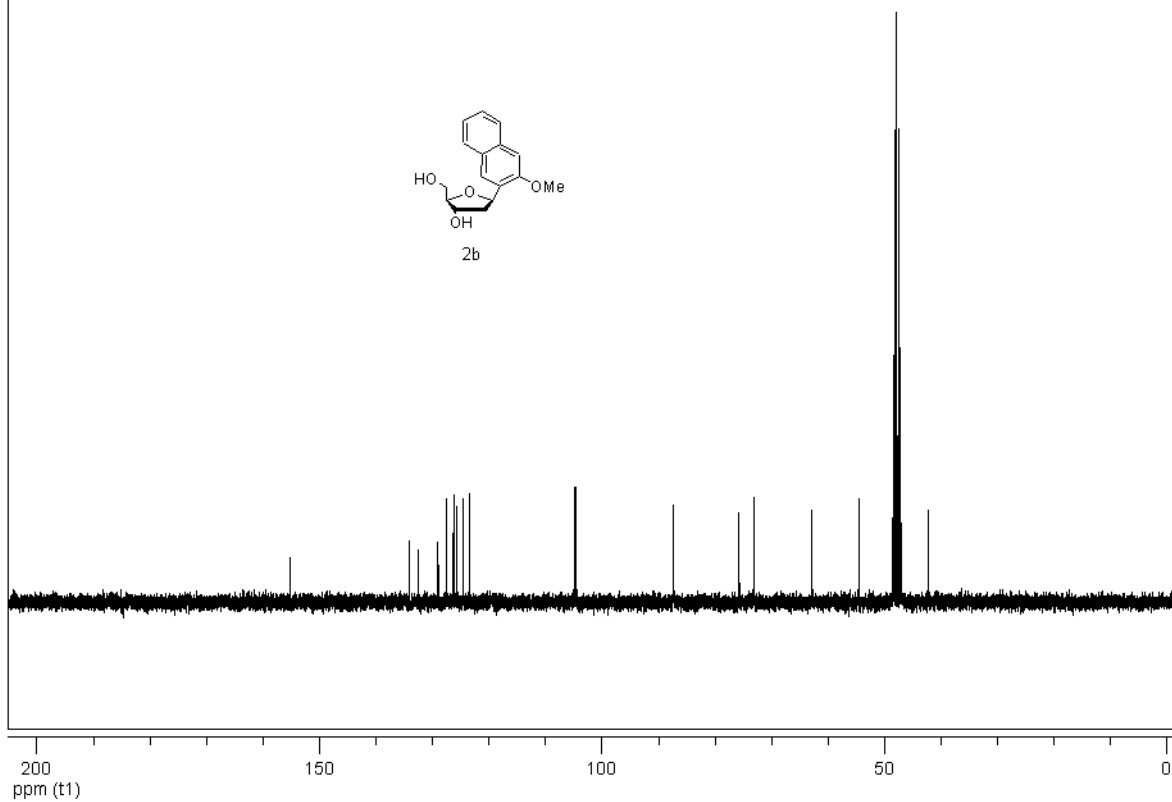



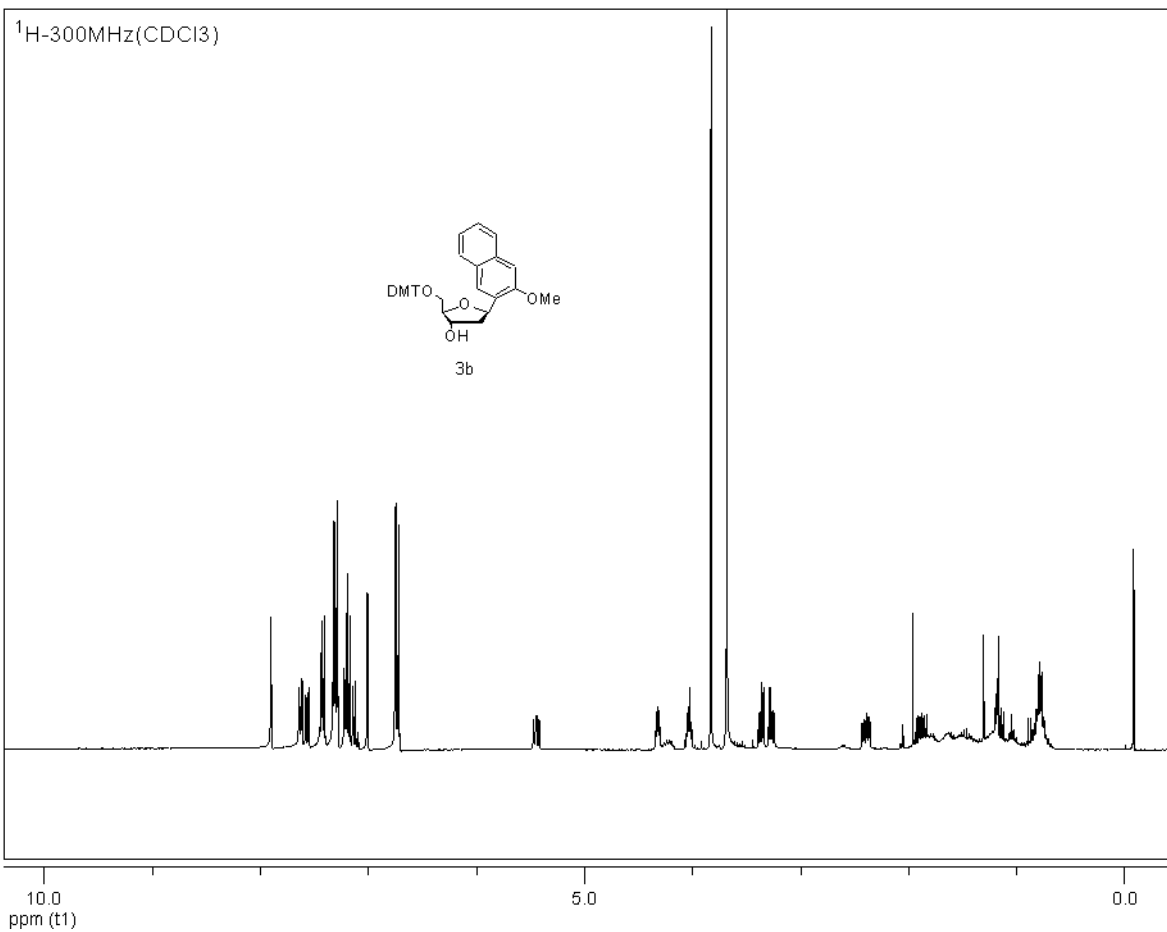

C<sup>13</sup>-300MHz(CDCl<sub>3</sub>)

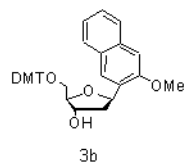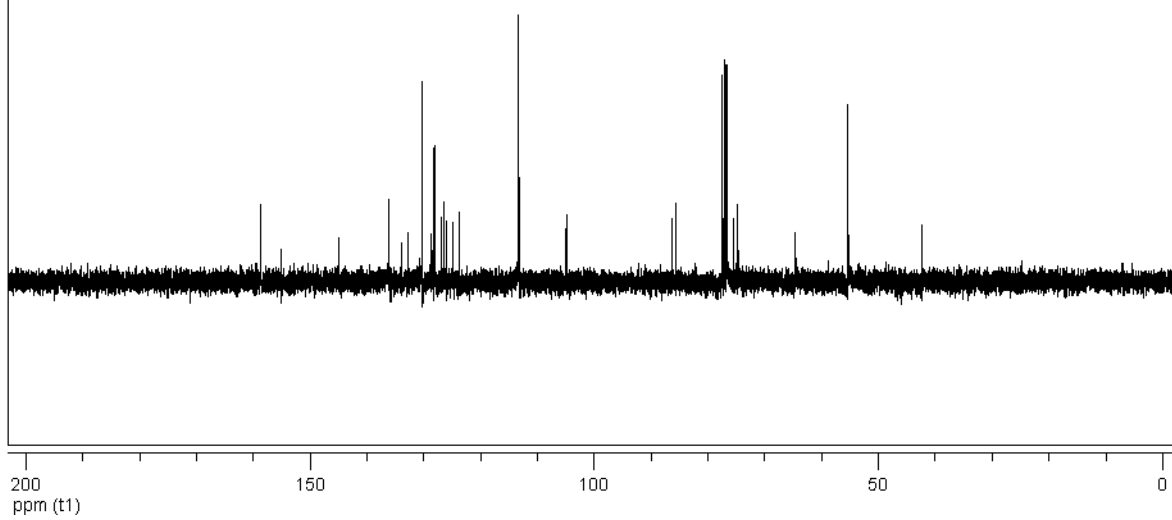

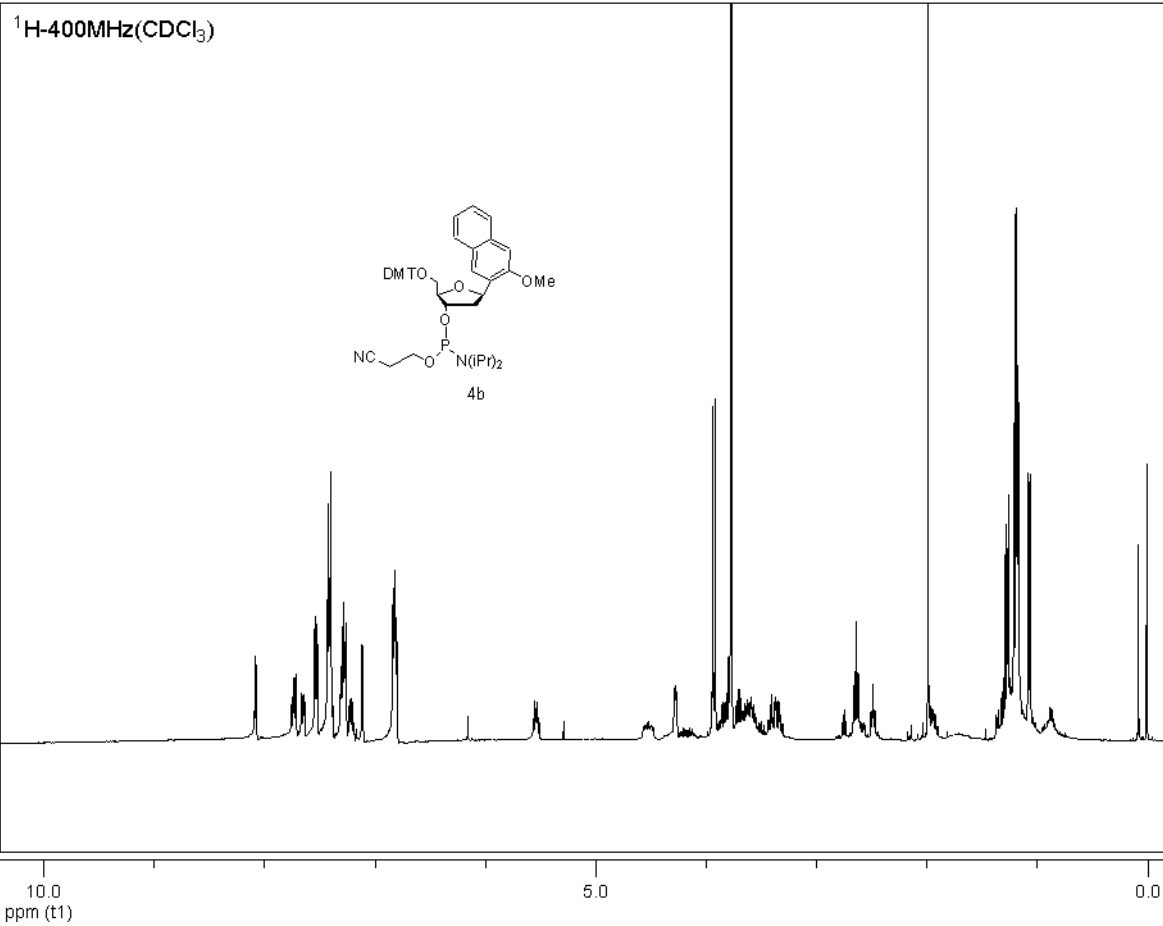

P<sup>31</sup>-400MHz(CDCl<sub>3</sub>)

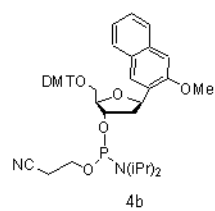

200  
ppm (t1)

150

100

50

0

P<sup>31</sup>-400MHz(D<sub>2</sub>O)

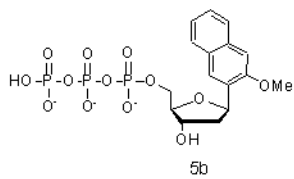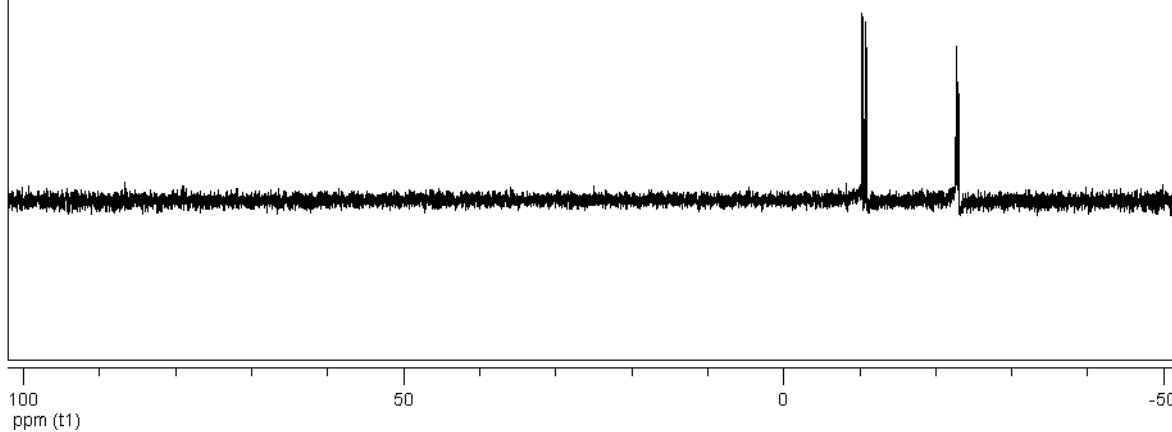

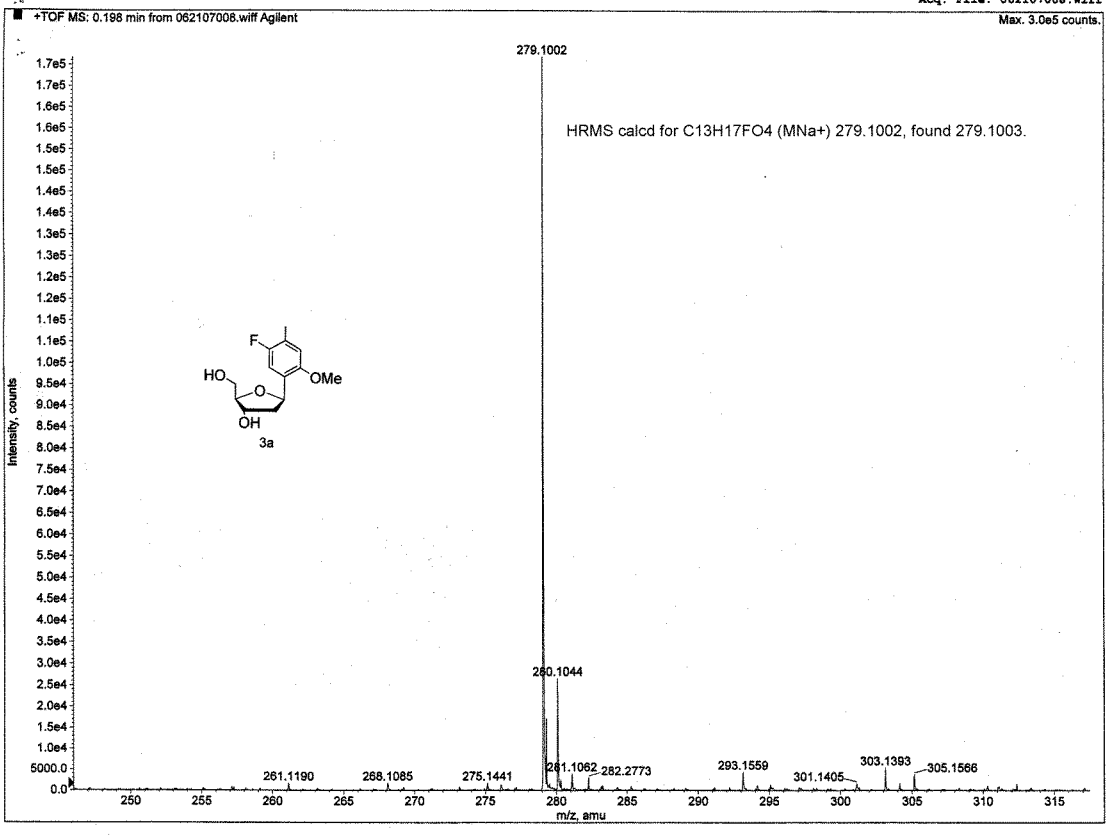

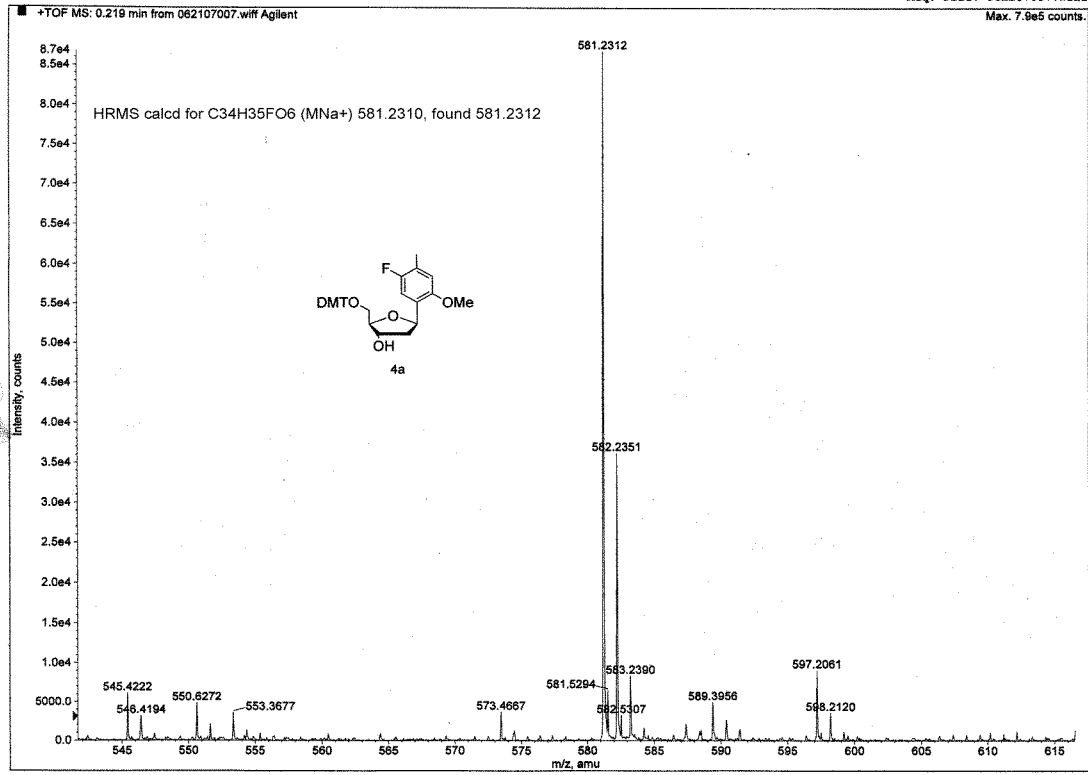

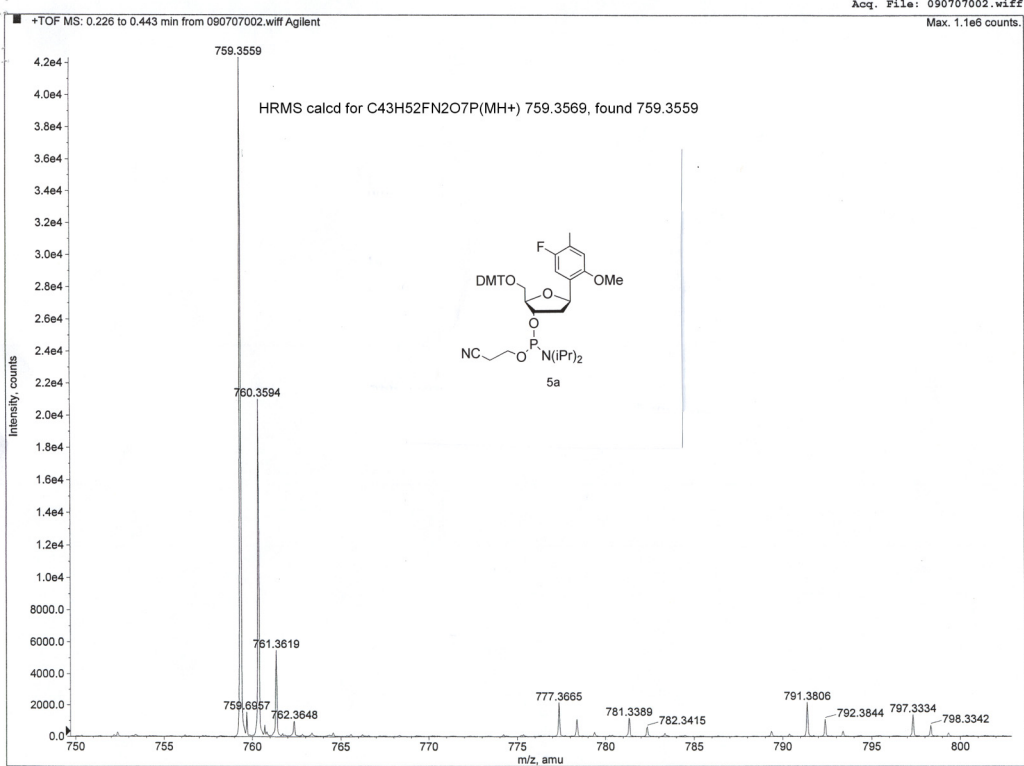



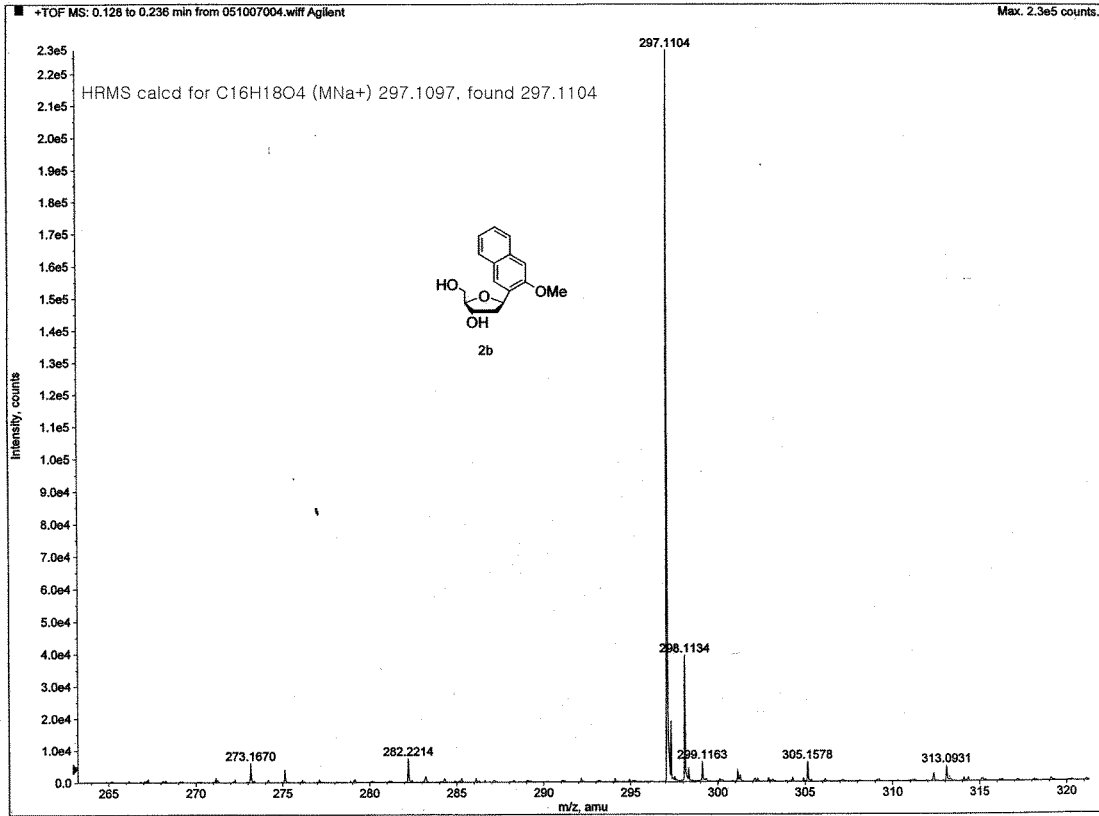

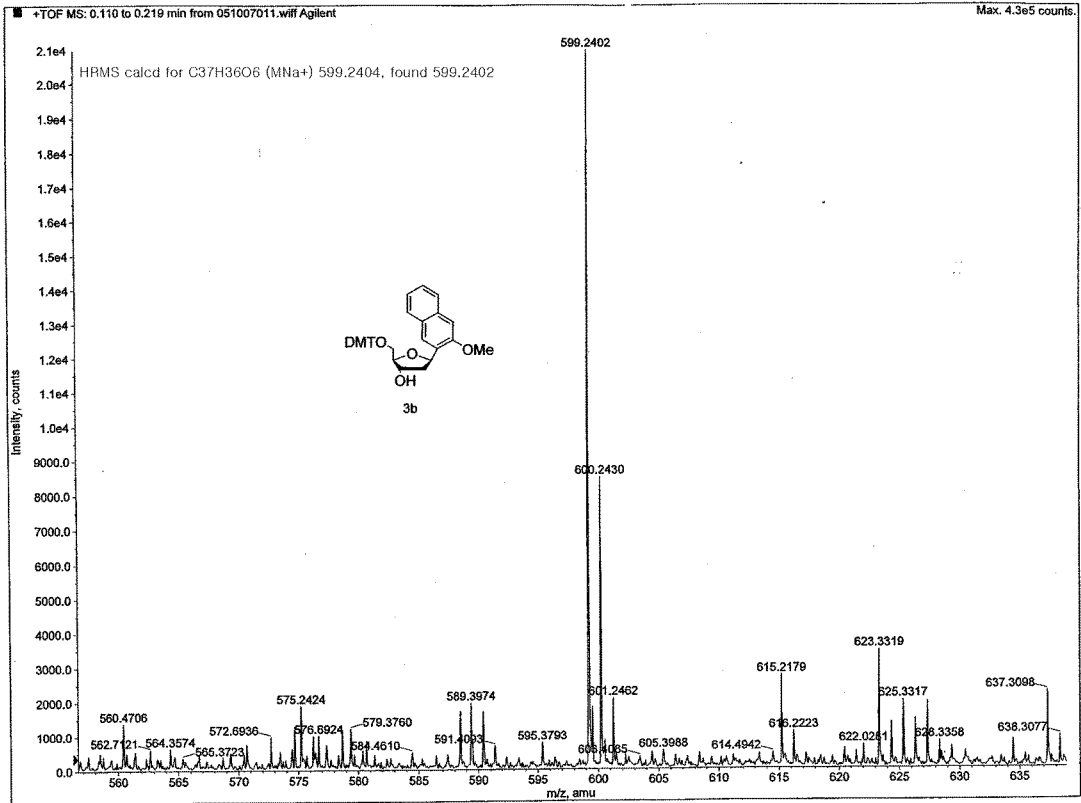

Polarity/Scan Type: Positive

Sample Name: xbya5757

Acq. I

Day, June 21, 2007

File: 062107004.wiff

Max. 4.3e5 counts.

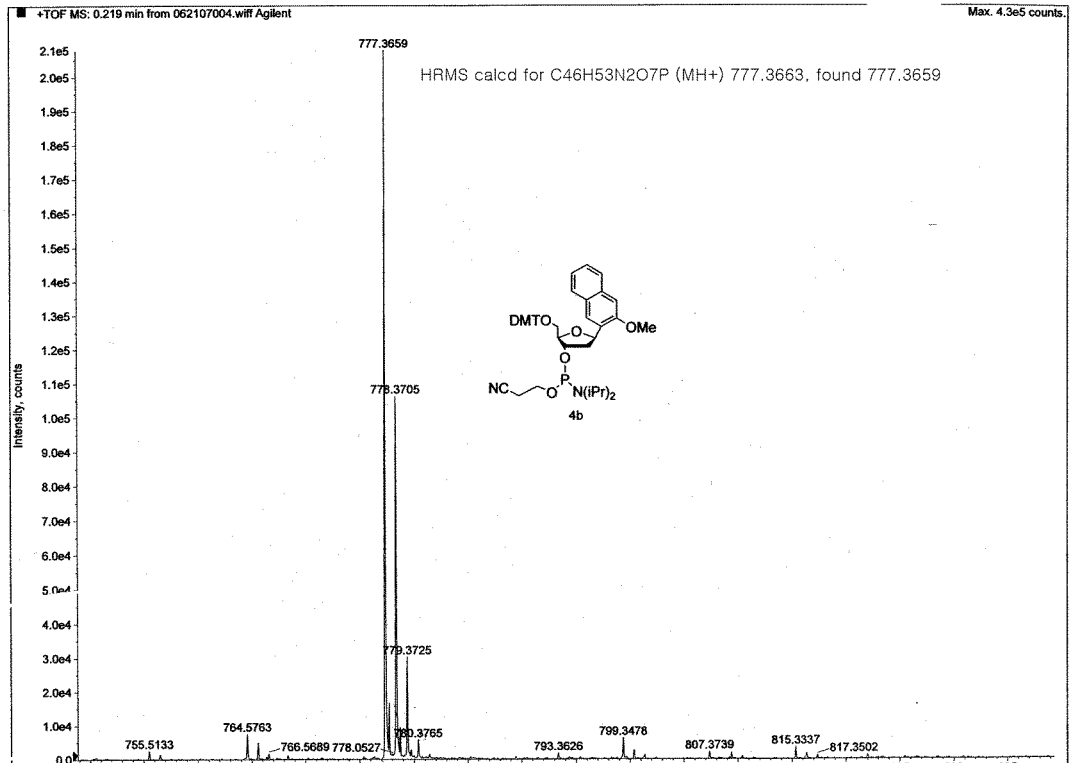

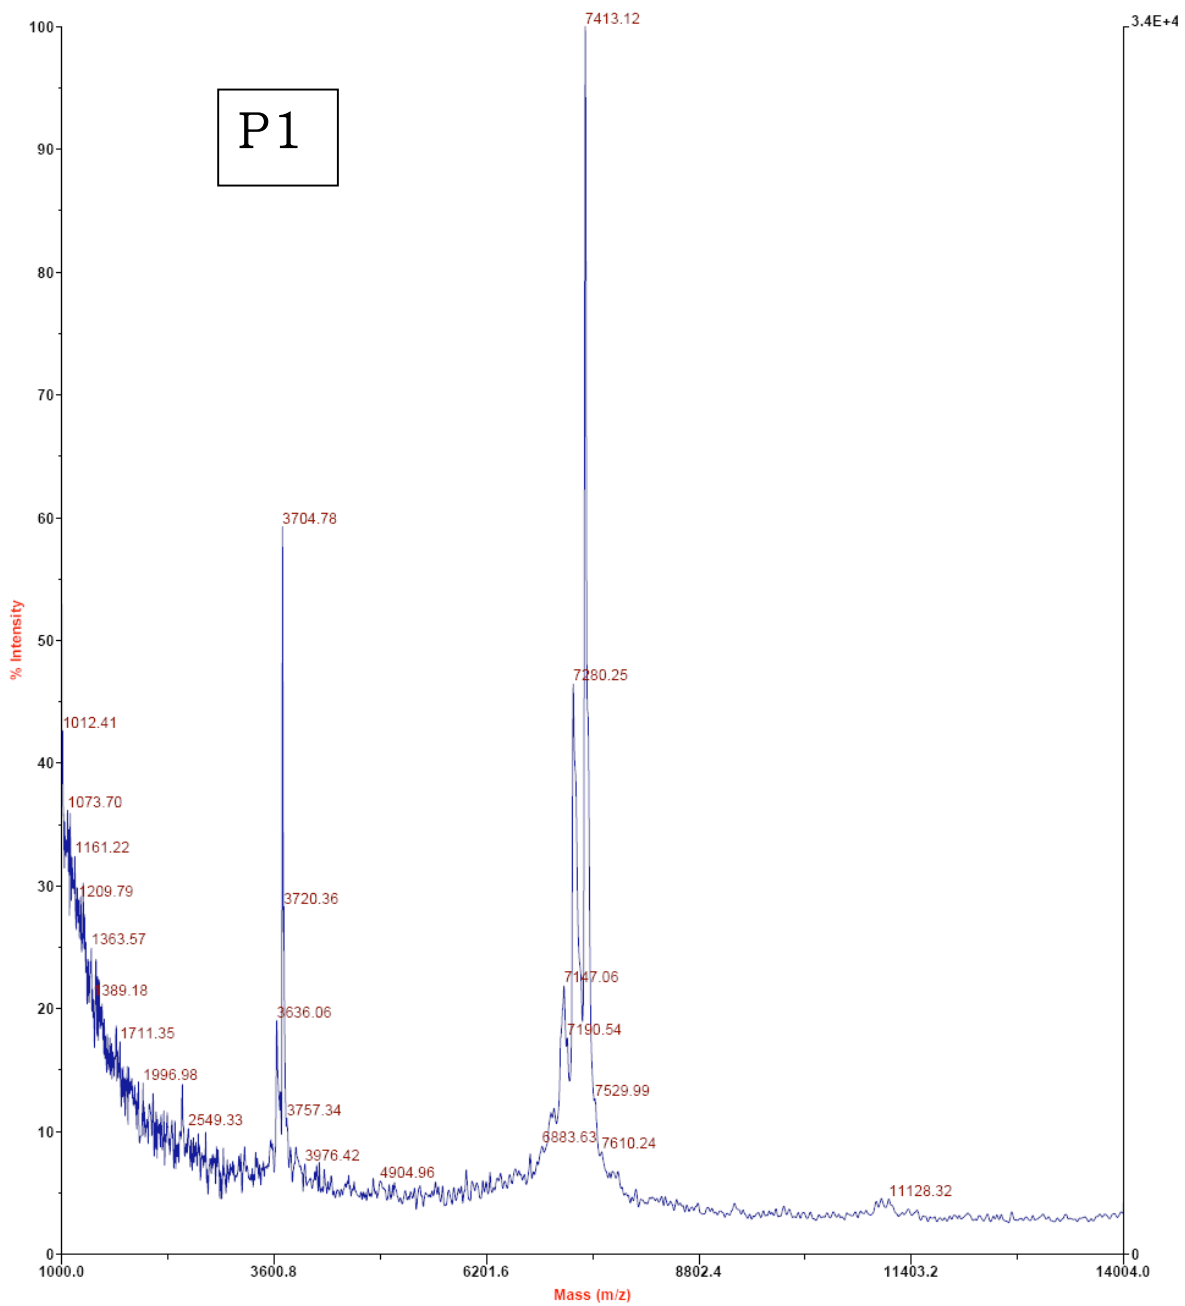

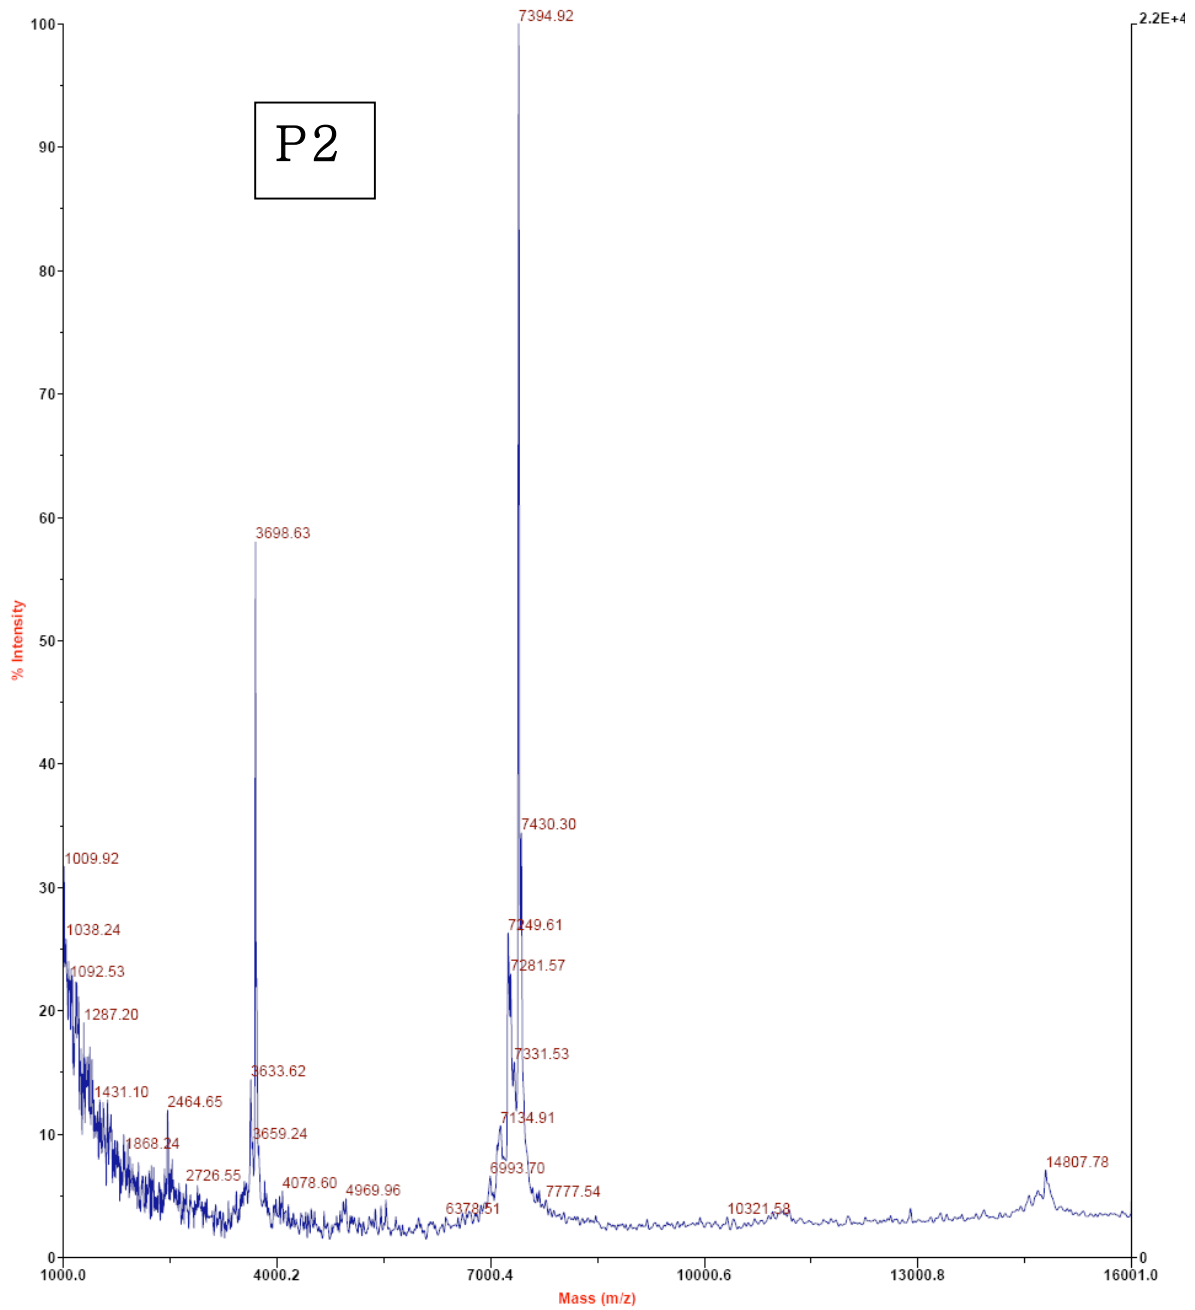

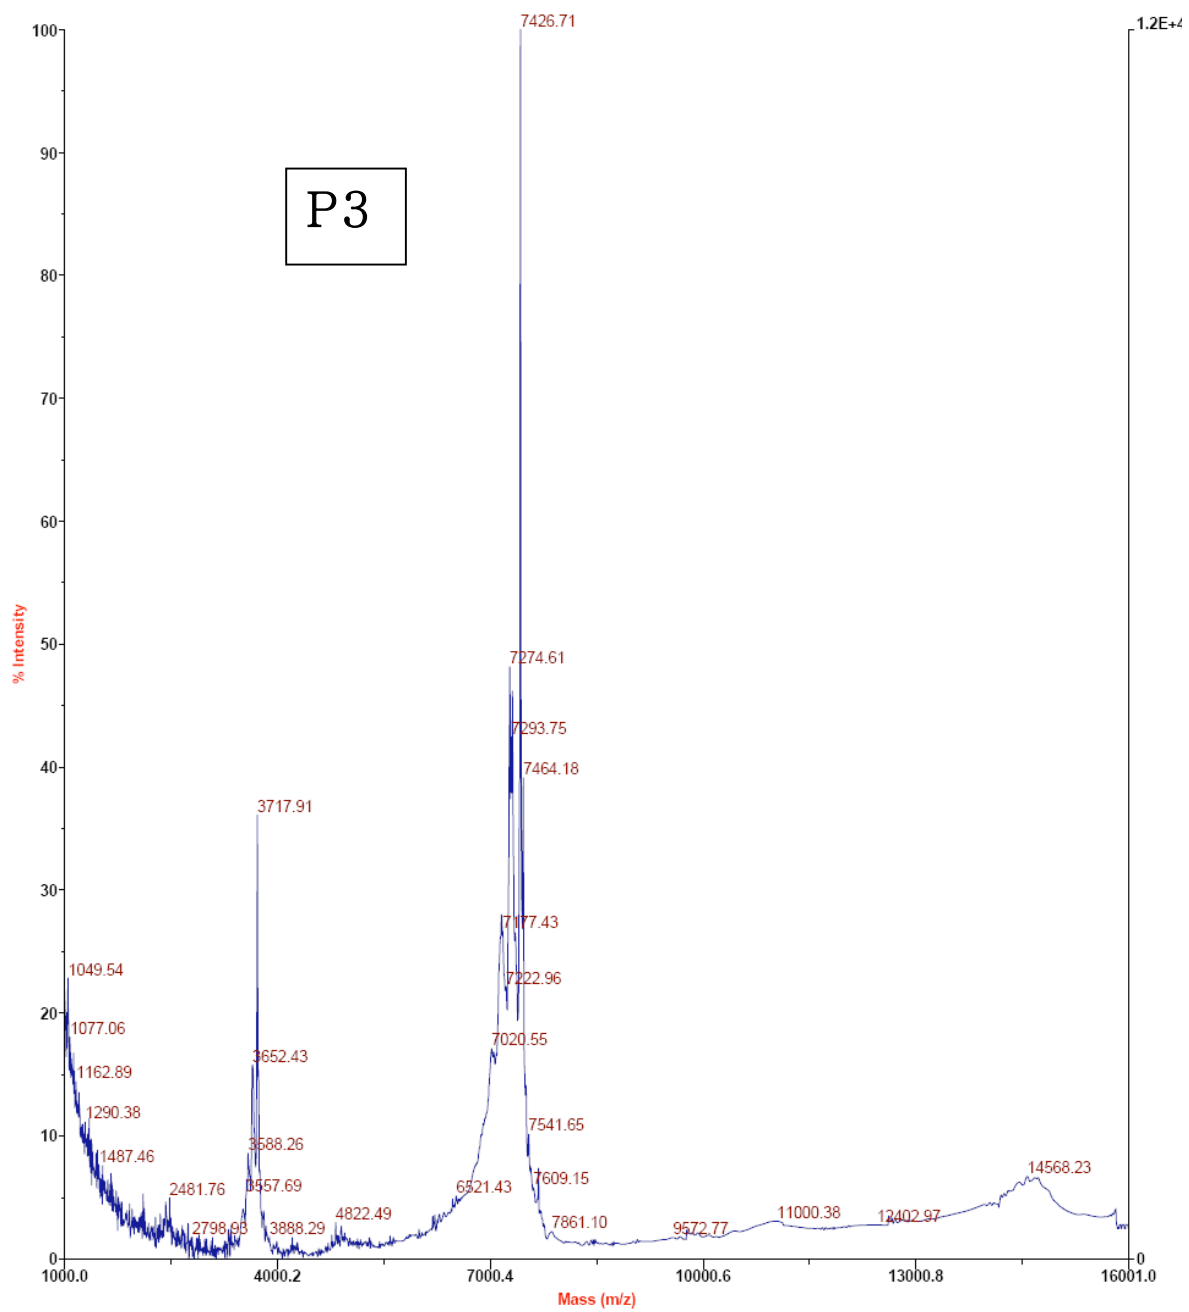

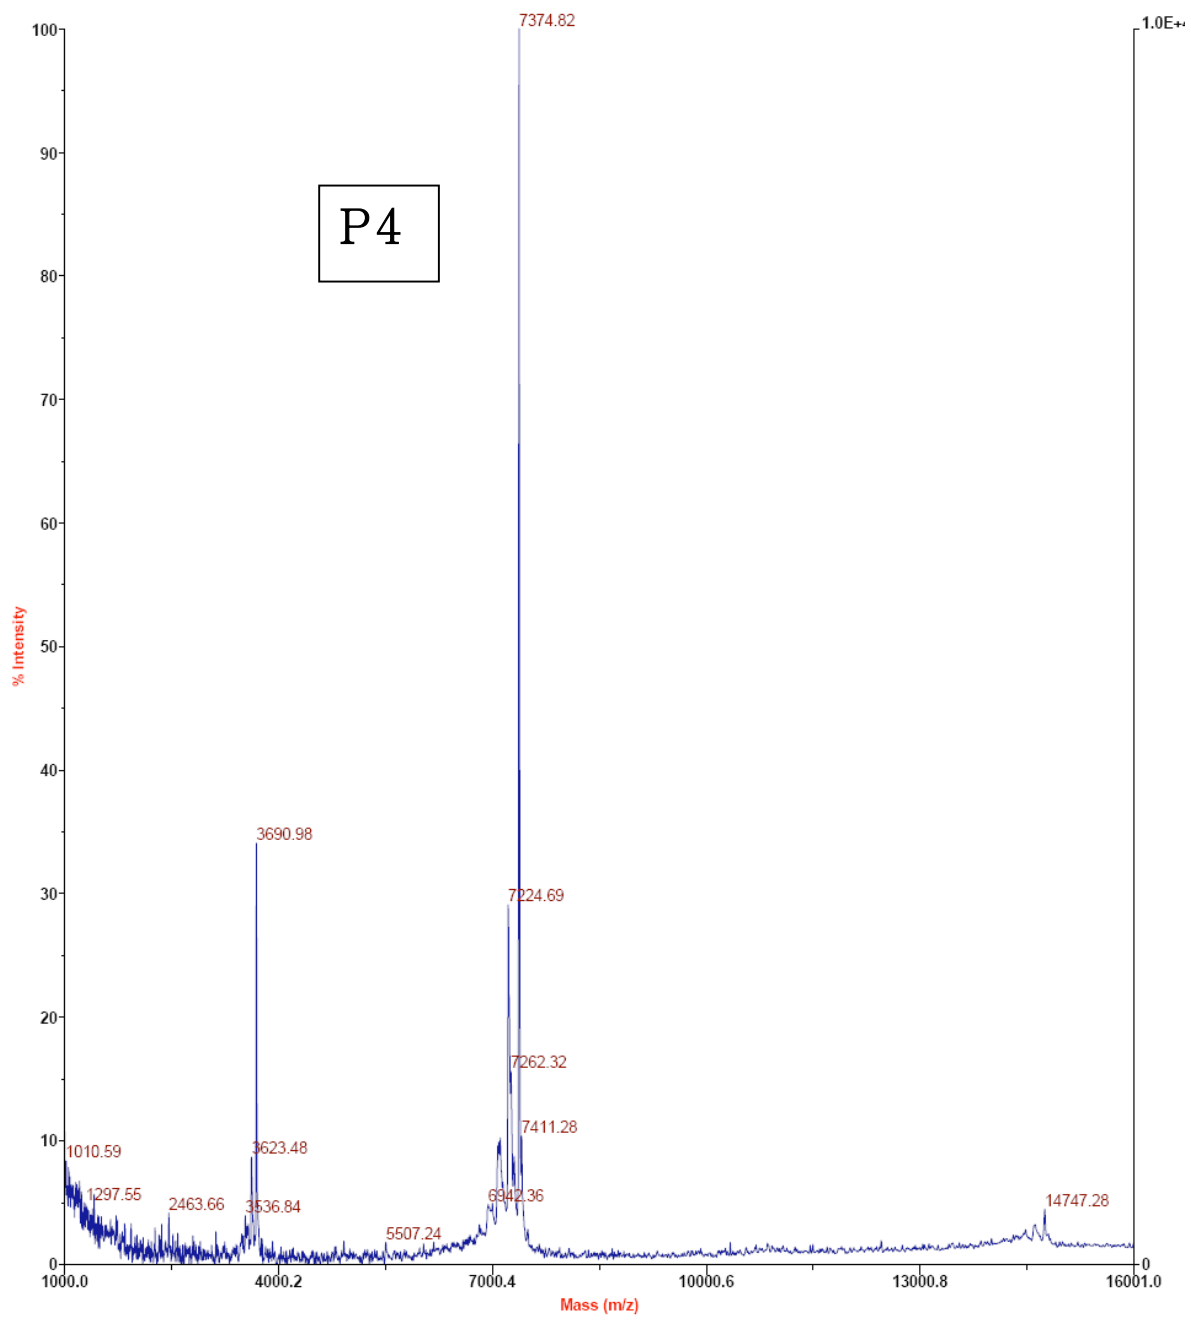

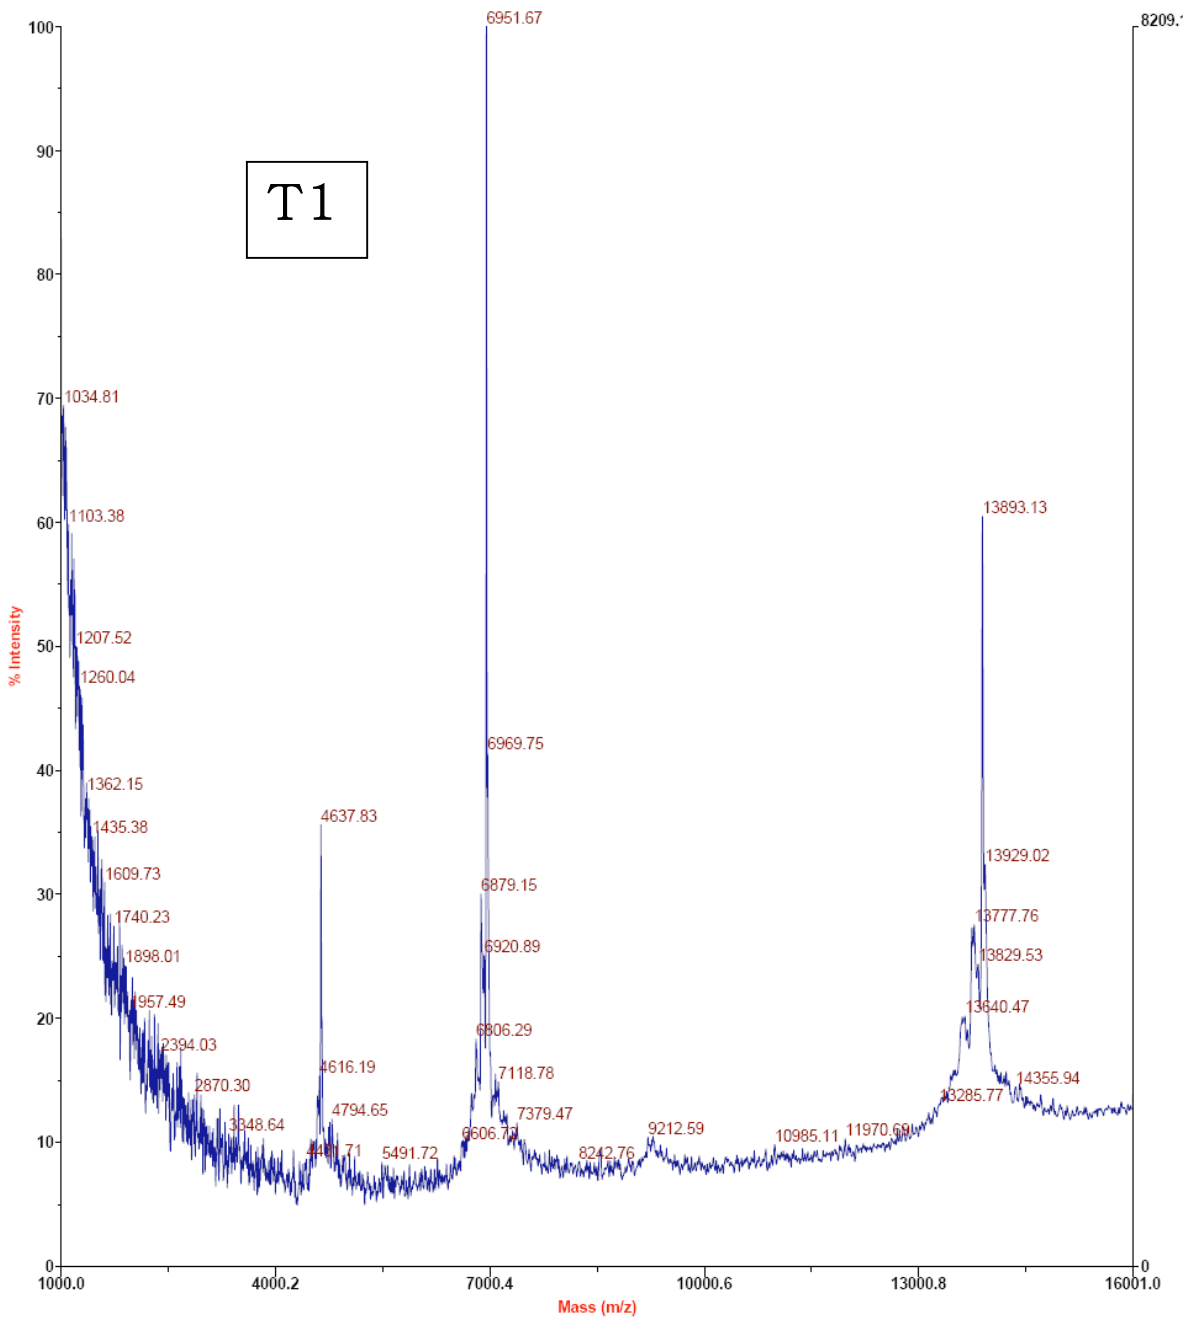



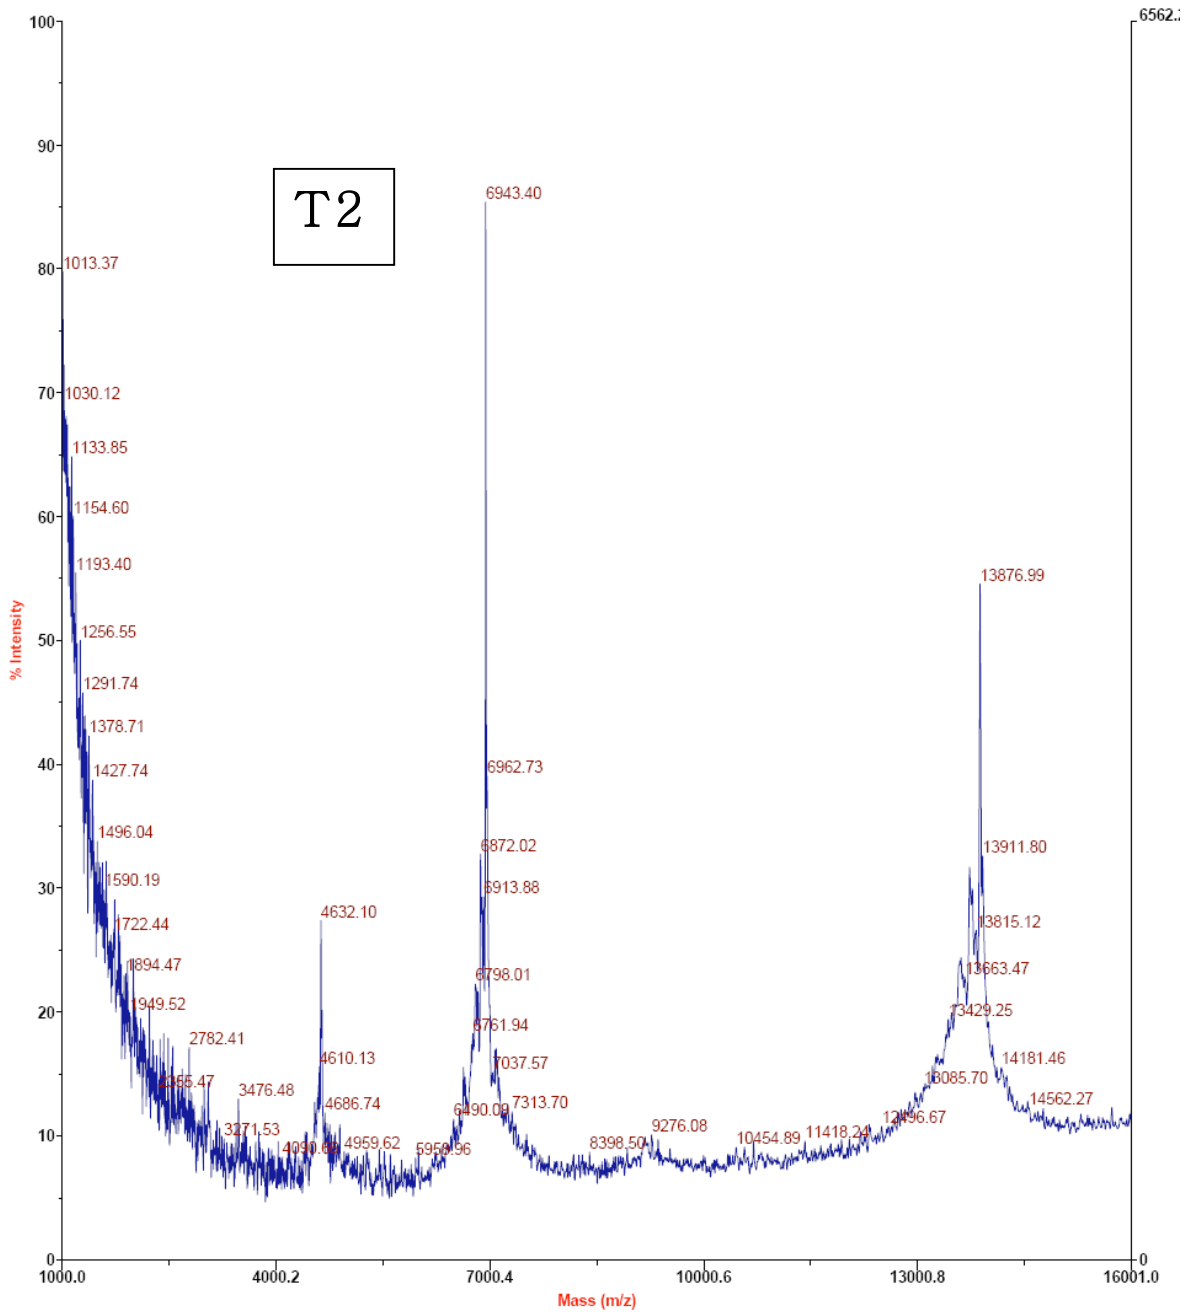

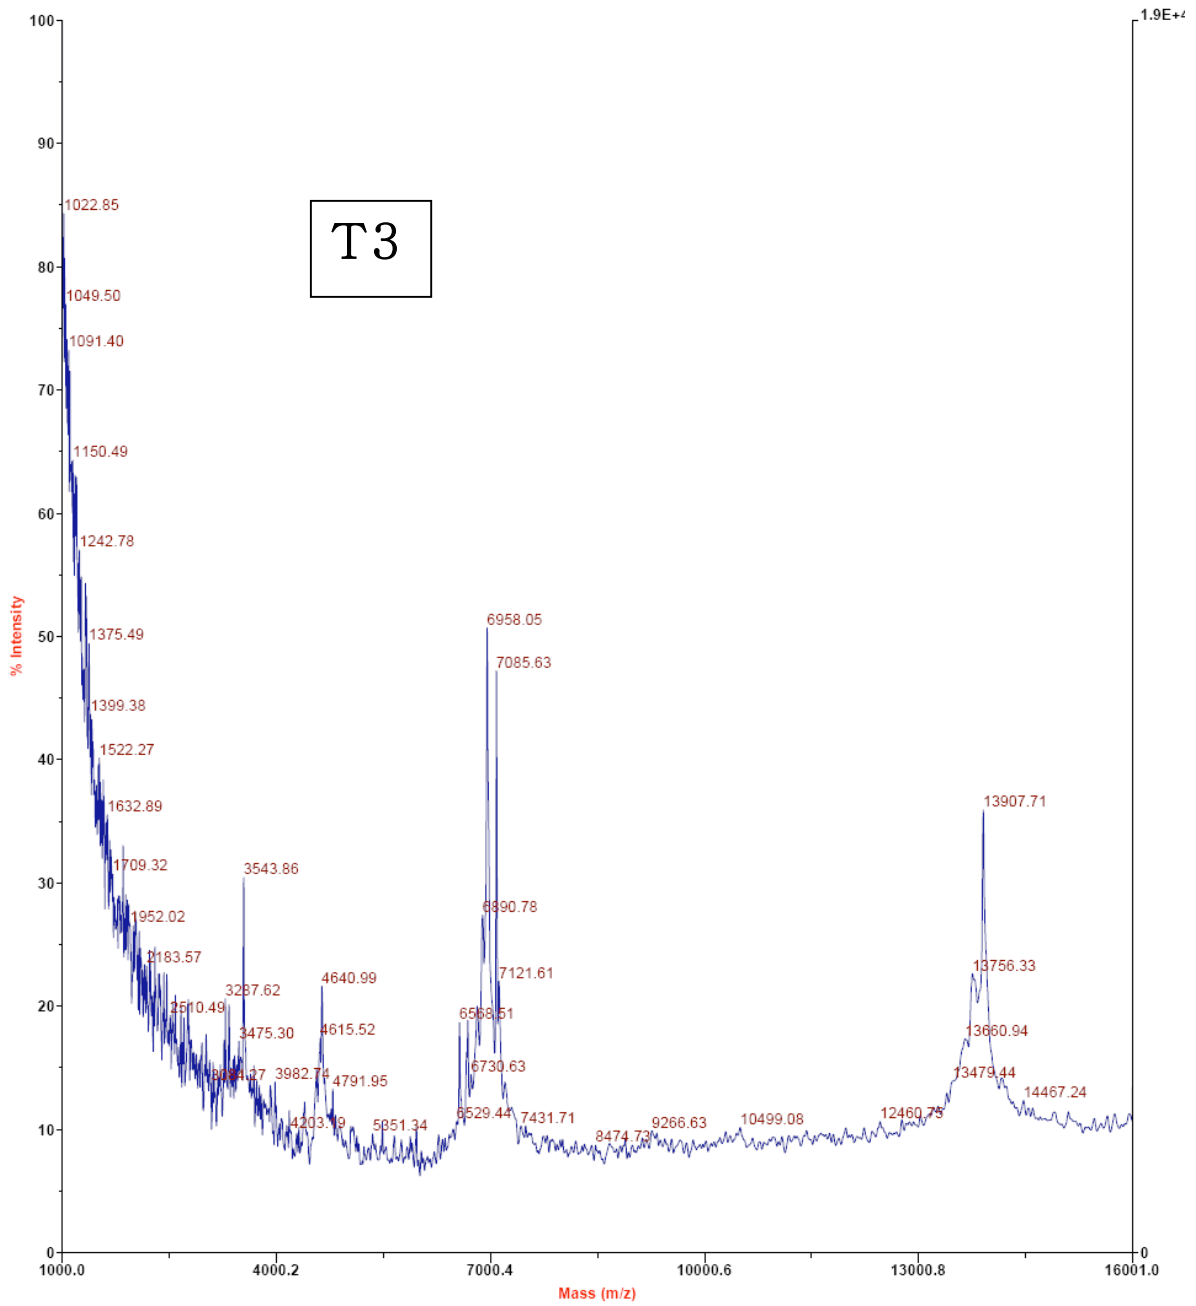

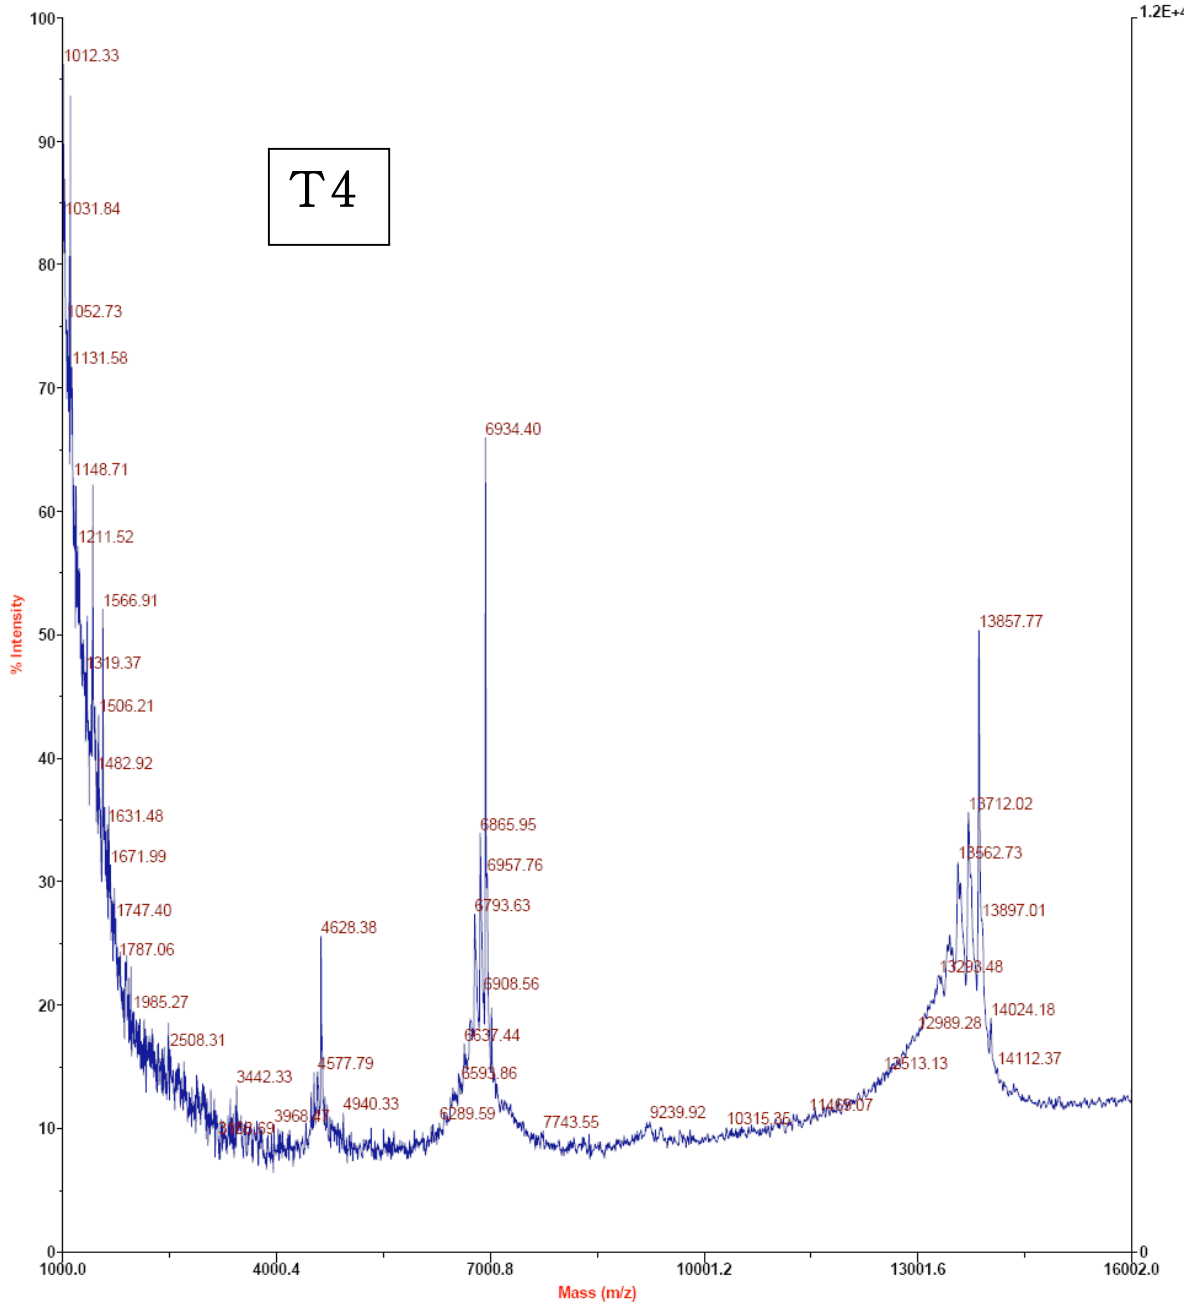

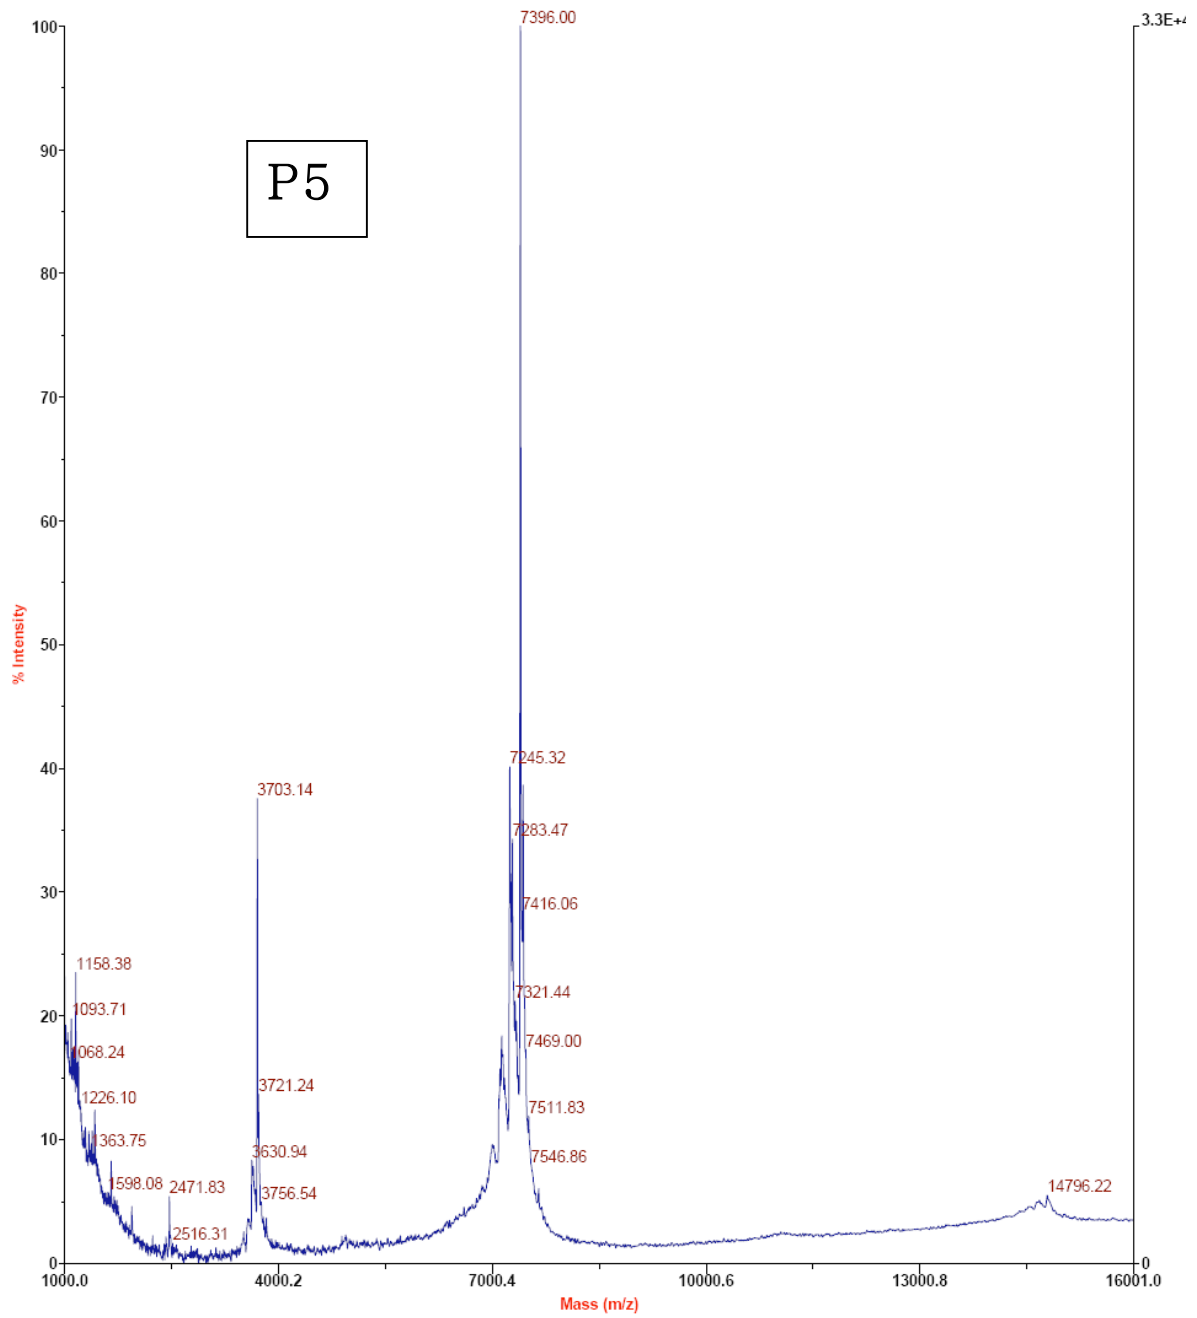

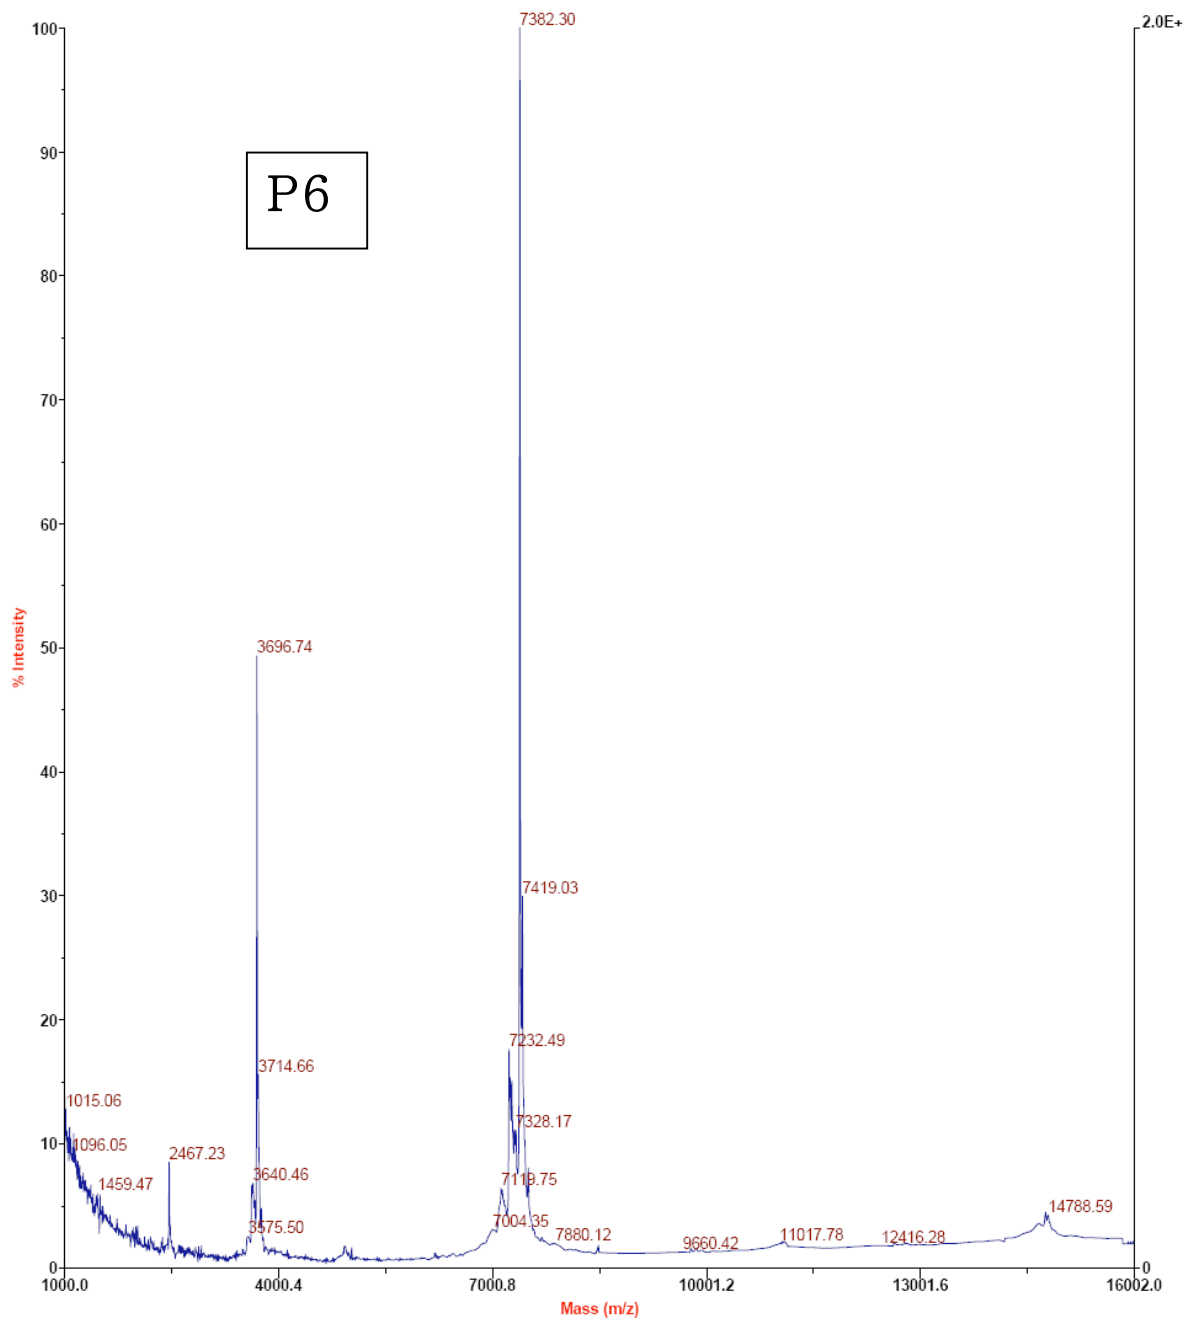

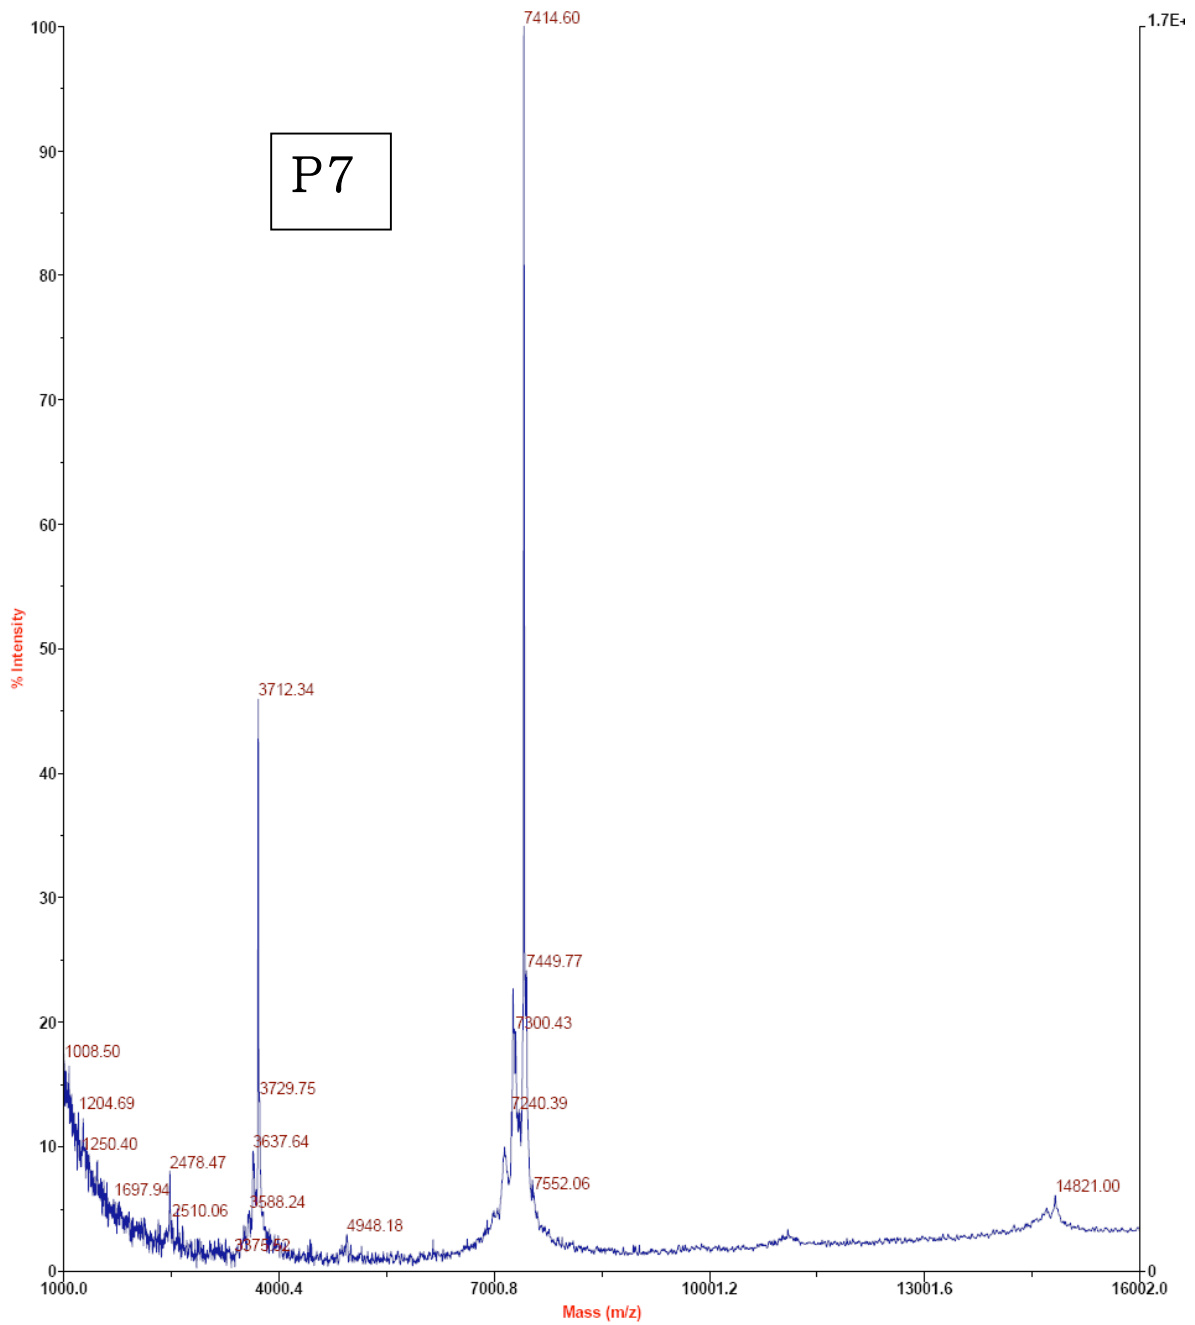

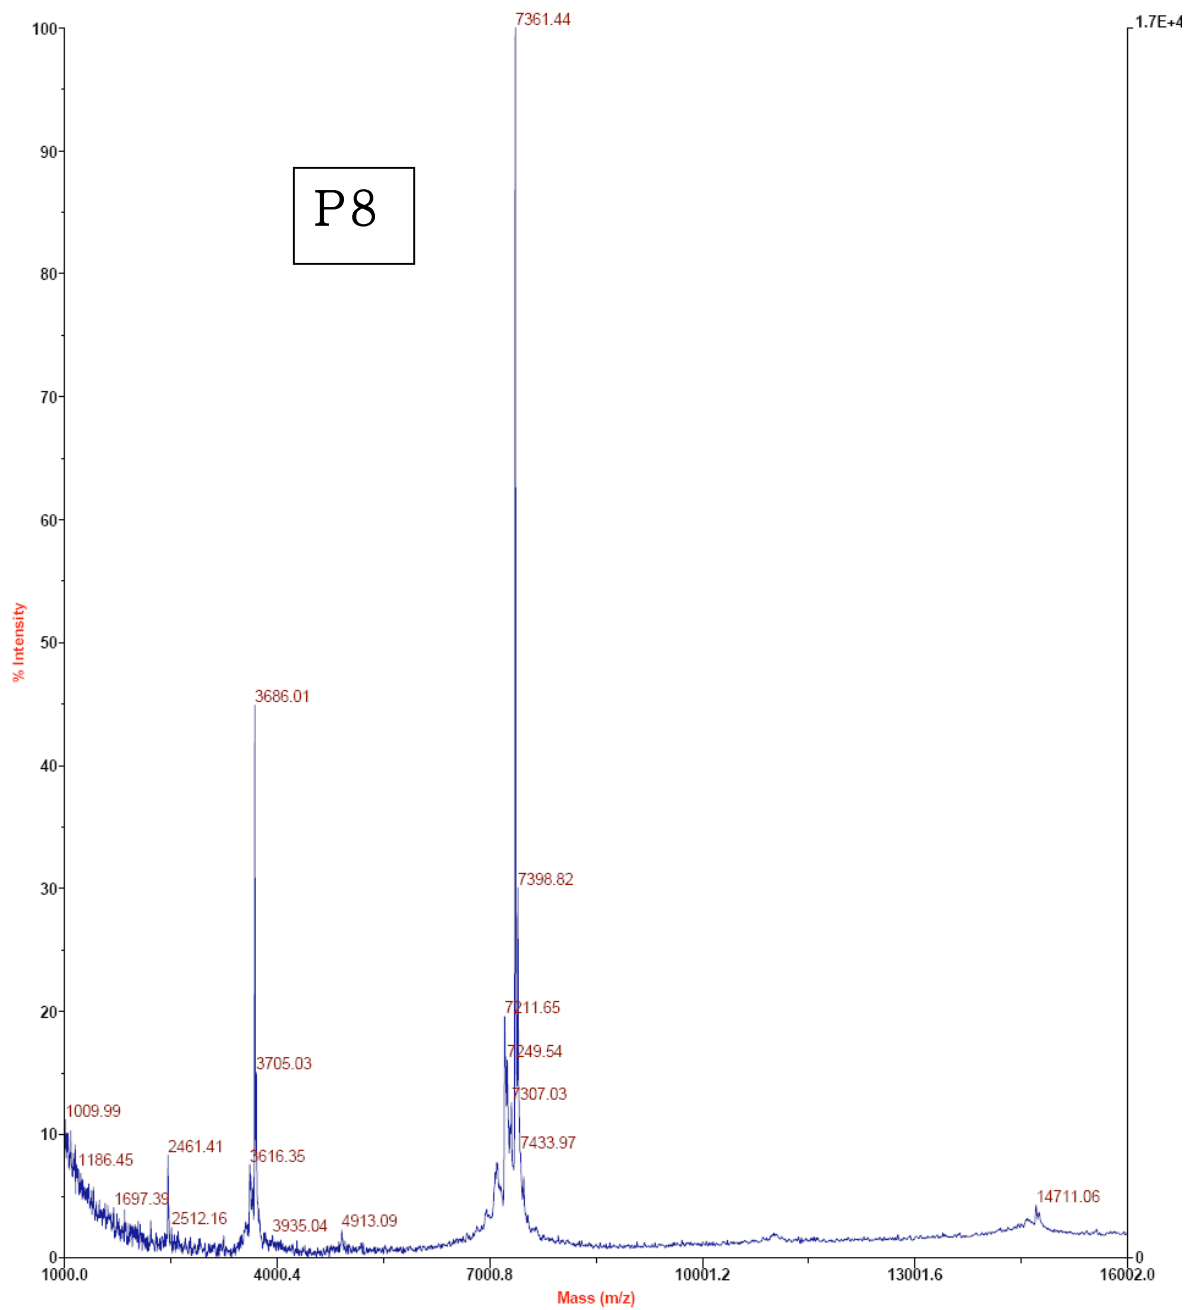

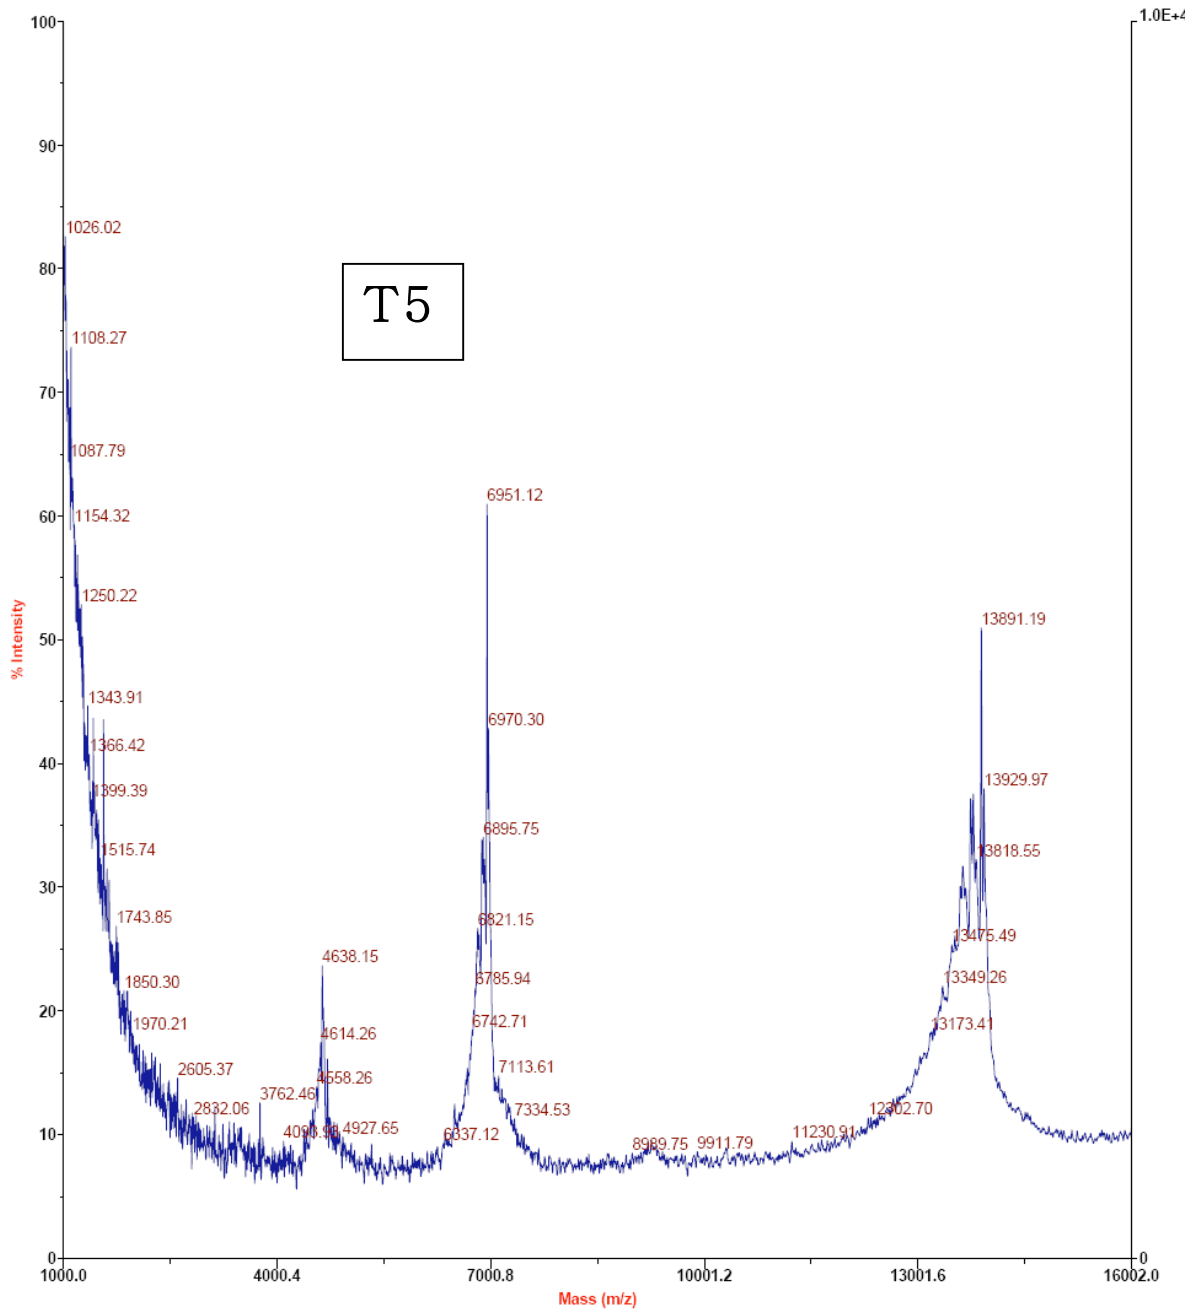



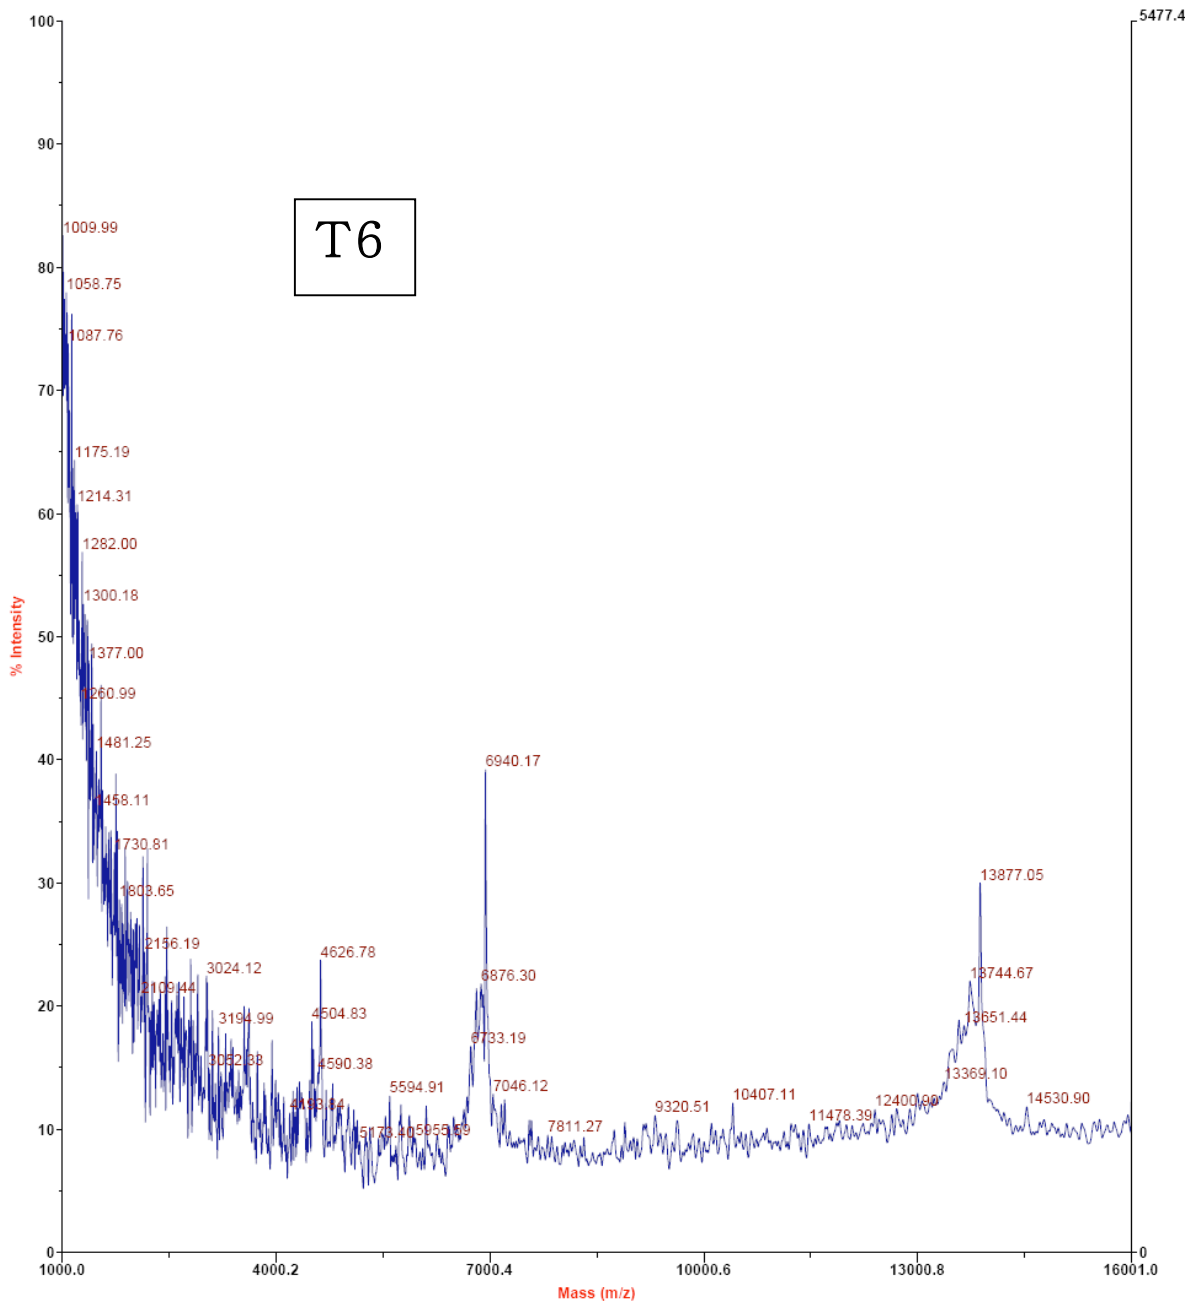

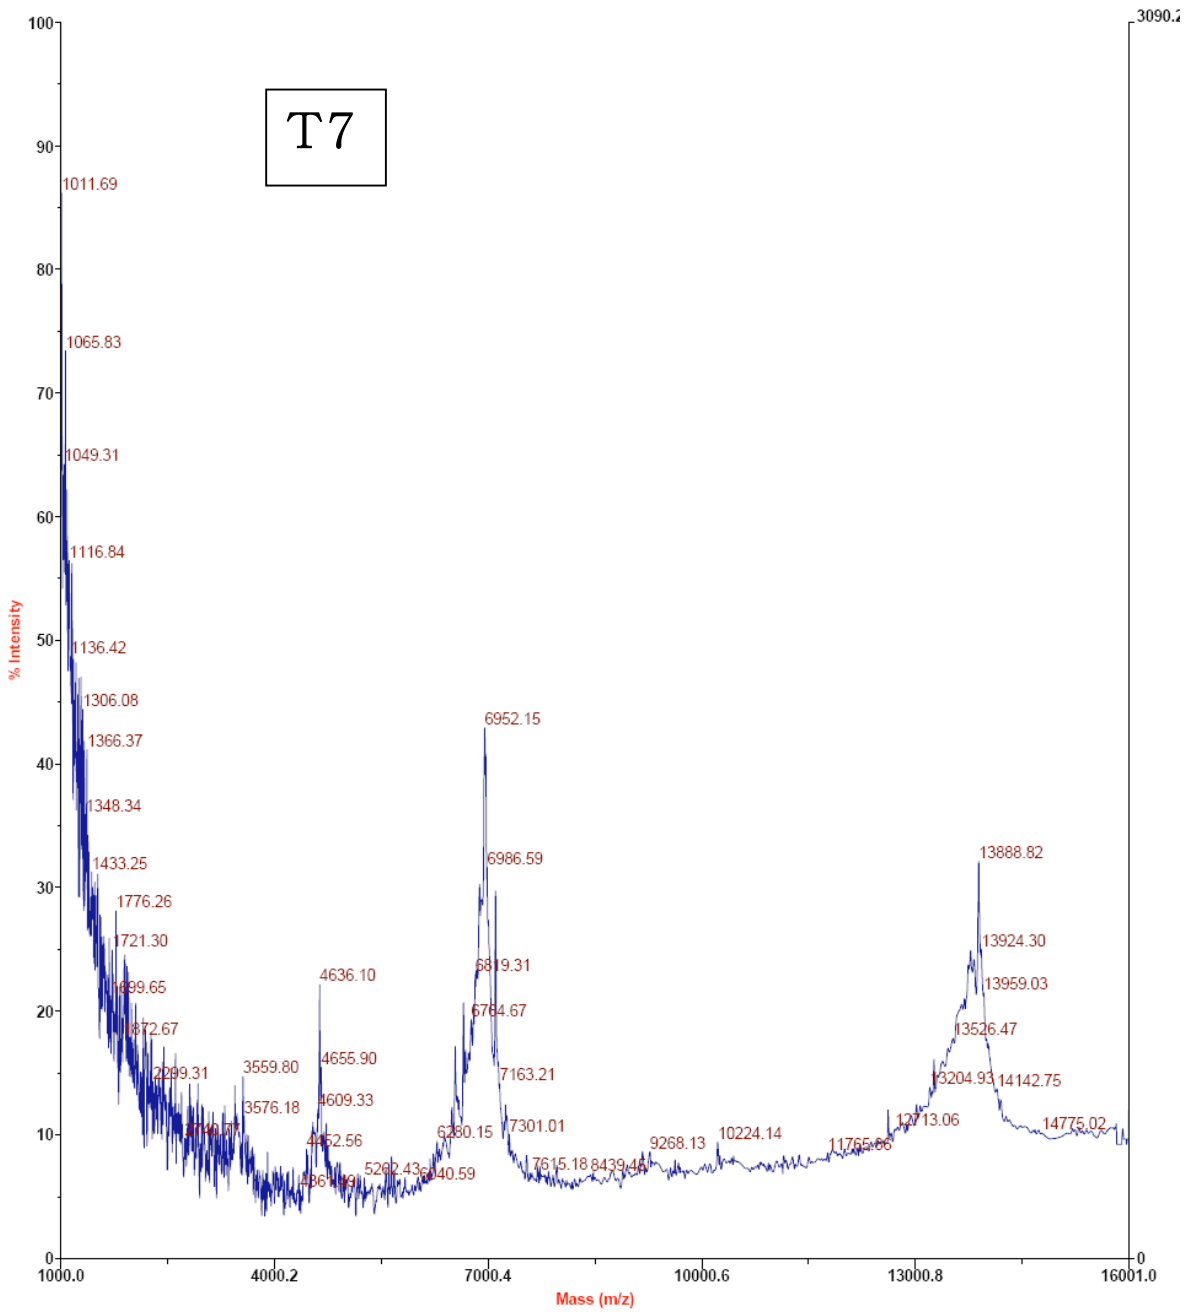

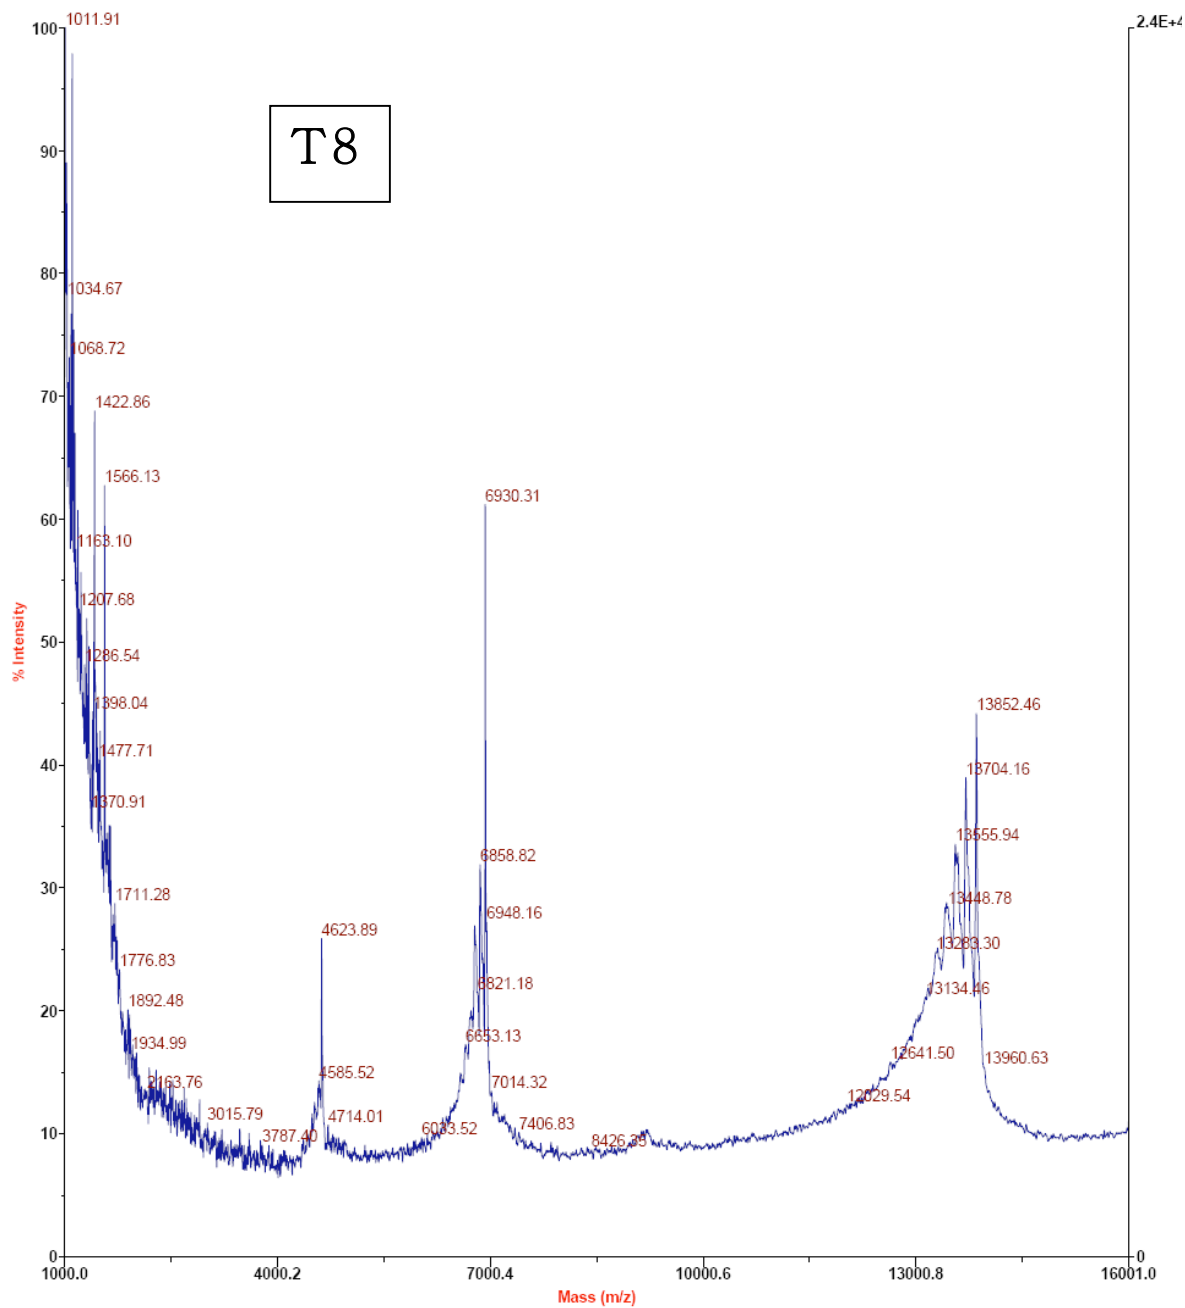

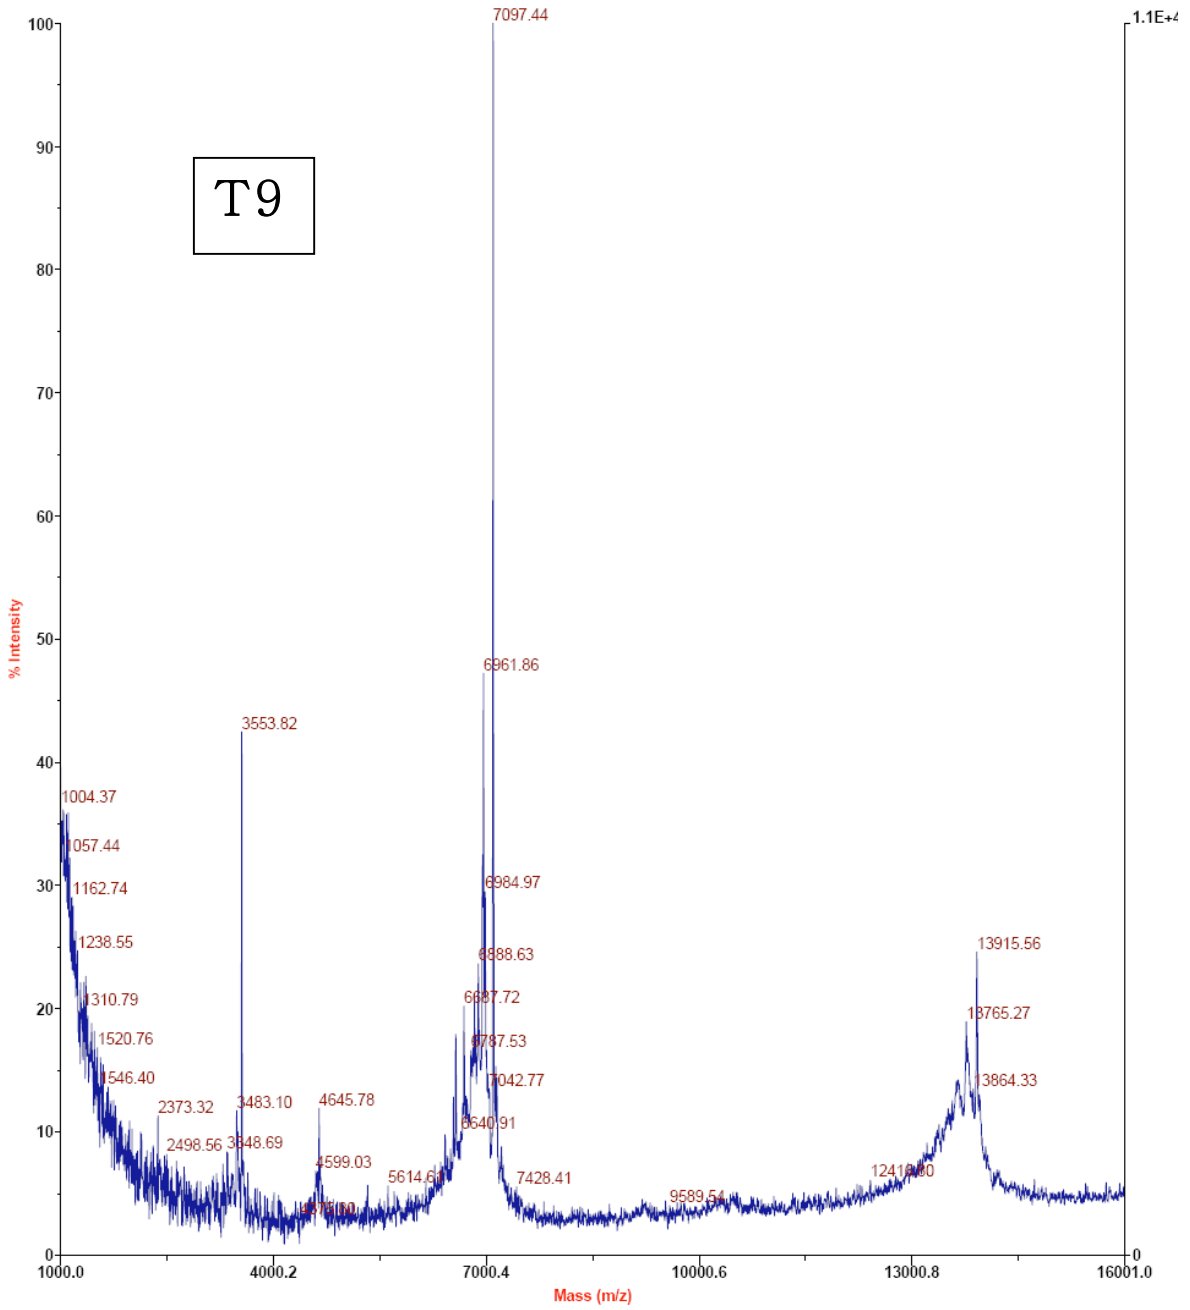

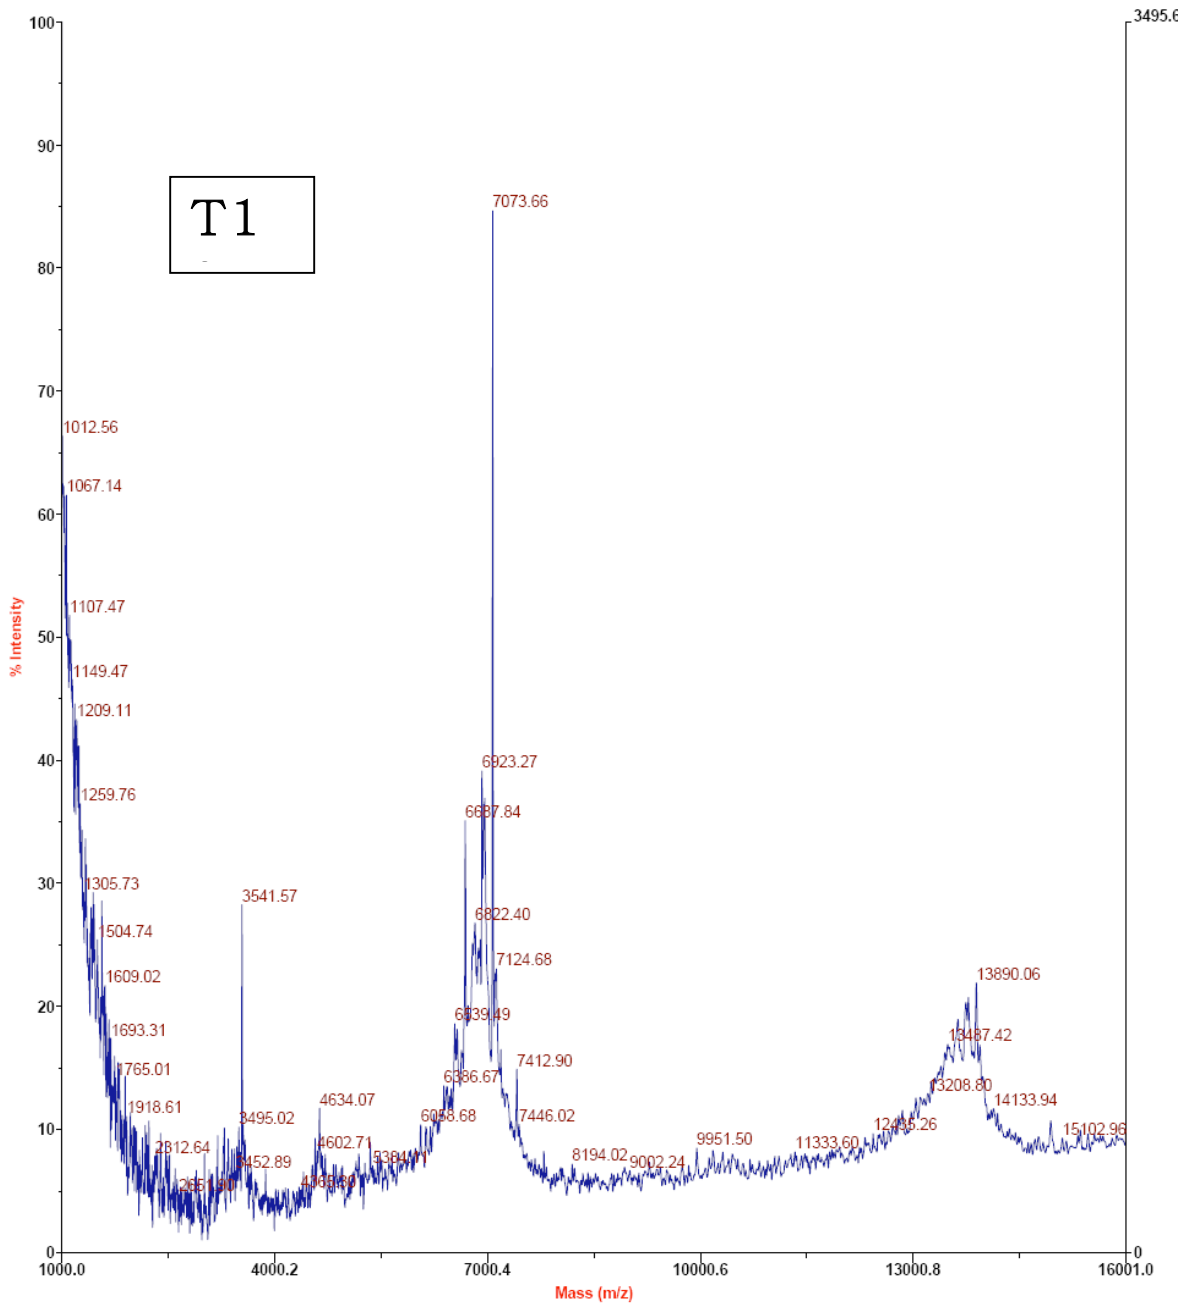

Supplement: NIHMS211676-supplement-SI.pdf [file NIHMS211676-supplement-SI.pdf]
